# Supplementary material for: Chalcogen bonds provide supramolecular association of beta-octamolybdate and chalconium cations
Source: Royal Society of Chemistry journal article supplement (doi:10.1039/d4qi02258k), 2024-01-01
Supplement: d4qi02258k1.pdf [file d4qi02258k1.pdf]

# Chalcogen bonds provide supramolecular association of beta-octamolybdate and chalconium cations

Anna A. Kuznetsova,<sup>a</sup> Vadim V. Yanshole,<sup>b,c</sup> Alexander S. Novikov,<sup>d,e</sup> Dmitrii S. Bolotin,<sup>d</sup> Maxim N. Sokolov<sup>a</sup> and Pavel A. Abramov<sup>\*a,f</sup>

<sup>a</sup> *Nikolaev Institute of Inorganic Chemistry, 3 Akad. Lavrentiev Ave. 630090, Russian Federation;*

<sup>b</sup> *International Tomography Center, Institutskaya str. 3a, 630090, Novosibirsk, Russian Federation;*

<sup>c</sup> *Novosibirsk State University, Pirogova str. 1, 630090, Novosibirsk, Russian Federation;*

<sup>d</sup> *Institute of Chemistry, Saint Petersburg State University, Universitetskiy prospect 26, Saint Petersburg, 198504, Russian Federation;*

<sup>e</sup> *Research Institute of Chemistry, Peoples' Friendship University of Russia (RUDN University), Miklukho-Maklaya Str. 6, 117198 Moscow, Russian Federation;*

<sup>f</sup> *Research School of Chemistry and Applied Biomedical Sciences, Tomsk Polytechnic University, Tomsk 634050, Russian Federation*

## Supporting Information

# Table of content

|                                                                                                                                                                                                                                                                                                                                                                                                                                                                                                                                                                                                                                                              |    |
|--------------------------------------------------------------------------------------------------------------------------------------------------------------------------------------------------------------------------------------------------------------------------------------------------------------------------------------------------------------------------------------------------------------------------------------------------------------------------------------------------------------------------------------------------------------------------------------------------------------------------------------------------------------|----|
| <b>Synthetic work and crystal growth</b> .....                                                                                                                                                                                                                                                                                                                                                                                                                                                                                                                                                                                                               | 3  |
| <b>Figure S1.</b> HR-ESI(+) data for the solution of [Te(bpy)Ph] <sub>4</sub> [β-Mo <sub>8</sub> O <sub>26</sub> ] in MeOH.....                                                                                                                                                                                                                                                                                                                                                                                                                                                                                                                              | 6  |
| <b>Figure S2.</b> <sup>1</sup> H NMR spectrum of <b>8</b> in d <sup>6</sup> -DMSO.....                                                                                                                                                                                                                                                                                                                                                                                                                                                                                                                                                                       | 7  |
| <b>Figure S3.</b> <sup>13</sup> C NMR spectrum of <b>8</b> in d <sup>6</sup> -DMSO.....                                                                                                                                                                                                                                                                                                                                                                                                                                                                                                                                                                      | 7  |
| <b>Figure S4.</b> π-π stacked dimer of [S(bPh)Mes] <sup>+</sup> cations in the crystal structure of <b>3</b> . ....                                                                                                                                                                                                                                                                                                                                                                                                                                                                                                                                          | 8  |
| <b>Figure S5.</b> π-π stacked dimer of [S(bPh)Mes] <sup>+</sup> cations in the crystal structure of <b>4</b> . ....                                                                                                                                                                                                                                                                                                                                                                                                                                                                                                                                          | 8  |
| <b>X-ray single-crystal diffraction studies</b> .....                                                                                                                                                                                                                                                                                                                                                                                                                                                                                                                                                                                                        | 9  |
| <b>Table S1.</b> SCXRD Experimental details .....                                                                                                                                                                                                                                                                                                                                                                                                                                                                                                                                                                                                            | 10 |
| <b>Mass spectrometry</b> .....                                                                                                                                                                                                                                                                                                                                                                                                                                                                                                                                                                                                                               | 13 |
| <b>Figure S6.</b> Full HR-ESI-MS(-) spectrum of <b>1</b> in CH <sub>3</sub> CN.....                                                                                                                                                                                                                                                                                                                                                                                                                                                                                                                                                                          | 13 |
| <b>Table S2.</b> Molecular peaks assignment.....                                                                                                                                                                                                                                                                                                                                                                                                                                                                                                                                                                                                             | 13 |
| <b>Figure S7.</b> Zoomed area of HR-ESI-MS(-) spectrum of <b>1</b> between 820 – 880 m/z. ....                                                                                                                                                                                                                                                                                                                                                                                                                                                                                                                                                               | 14 |
| <b>Figure S8.</b> Zoomed area of HR-ESI-MS(-) spectrum of <b>1</b> between 1220 – 1300 m/z. ....                                                                                                                                                                                                                                                                                                                                                                                                                                                                                                                                                             | 14 |
| <b>Figure S9.</b> Zoomed area of HR-ESI-MS(-) spectrum of <b>1</b> between 1450 – 1530 m/z. ....                                                                                                                                                                                                                                                                                                                                                                                                                                                                                                                                                             | 14 |
| <b>Figure S10.</b> Zoomed area of HR-ESI-MS(-) spectrum of <b>1</b> between 1700 – 1750 m/z. ....                                                                                                                                                                                                                                                                                                                                                                                                                                                                                                                                                            | 15 |
| <b>Figure S11.</b> σ-(S <sup>IV</sup> )-hole···O=Mo interactions in the crystal structure of (Me <sub>3</sub> S) <sub>4</sub> [Mo <sub>8</sub> O <sub>26</sub> ] (CCDC 907956, DEPNUM).....                                                                                                                                                                                                                                                                                                                                                                                                                                                                  | 16 |
| <b>Figure S12.</b> Visualization of electron localization function (ELF) distribution in the area of bifurcated intermolecular interactions Se···O in the X-ray structure <b>7</b> .....                                                                                                                                                                                                                                                                                                                                                                                                                                                                     | 17 |
| <b>Figure S13.</b> Visualization of electron localization function (ELF) distribution in the area of bifurcated intermolecular interactions Te···O in the X-ray structure <b>8</b> . ....                                                                                                                                                                                                                                                                                                                                                                                                                                                                    | 18 |
| <b>Computational details</b> .....                                                                                                                                                                                                                                                                                                                                                                                                                                                                                                                                                                                                                           | 19 |
| <b>Table S3.</b> Values of the density of all electrons – ρ( <b>r</b> ), Laplacian of electron density – ∇ <sup>2</sup> ρ( <b>r</b> ) and appropriate λ <sub>2</sub> eigenvalues, energy density – H <sub>b</sub> , potential energy density – V( <b>r</b> ), Lagrangian kinetic energy – G( <b>r</b> ), and electron localization function – ELF (a.u.) at the bond critical points (3, –1), corresponding to intermolecular interactions Ch···O (Ch = S, Se, Te) in the obtained X-ray structures <b>1</b> , <b>2</b> , <b>5</b> – <b>[9]</b> · <b>2CH<sub>3</sub>OH</b> , and estimated strength for these interactions E <sub>int</sub> (kcal/mol). .... | 20 |
| <b>Table S4.</b> Values of the density of all electrons – ρ( <b>r</b> ), Laplacian of electron density – ∇ <sup>2</sup> ρ( <b>r</b> ) and appropriate λ <sub>2</sub> eigenvalues, energy density – H <sub>b</sub> , potential energy density – V( <b>r</b> ), Lagrangian kinetic energy – G( <b>r</b> ), and electron localization function – ELF (a.u.) at the bond critical points (3, –1), corresponding to intermolecular interactions C···C in the obtained X-ray structures <b>1</b> – <b>5</b> and <b>[9]</b> · <b>2CH<sub>3</sub>OH</b> , and estimated strength for these interactions E <sub>int</sub> (kcal/mol). ....                            | 21 |
| <b>Figure S12.</b> Model for calculations from the crystal structure of <b>1</b> . ....                                                                                                                                                                                                                                                                                                                                                                                                                                                                                                                                                                      | 22 |
| <b>Figure S13.</b> Model for calculations from the crystal structure of <b>2</b> . ....                                                                                                                                                                                                                                                                                                                                                                                                                                                                                                                                                                      | 23 |
| <b>Figure S14.</b> Model for calculations from the crystal structure of <b>5</b> . ....                                                                                                                                                                                                                                                                                                                                                                                                                                                                                                                                                                      | 24 |
| <b>Figure S15.</b> Model for calculations from the crystal structure of <b>9</b> . ....                                                                                                                                                                                                                                                                                                                                                                                                                                                                                                                                                                      | 25 |
| <b>Table S5.</b> Cartesian atomic coordinates for model supramolecular associates. ....                                                                                                                                                                                                                                                                                                                                                                                                                                                                                                                                                                      | 26 |

## Synthetic work and crystal growth

### General information

$(n\text{-Bu}_4\text{N})_4[\beta\text{-Mo}_8\text{O}_{26}]^1$  and the chalconium salts<sup>2,3</sup> were prepared according to the literature data. Other reagents were of commercial quality (Sigma–Aldrich) and were used without additional purification. Elemental analyses were carried out on a MICRO Cube CHN analyzer. IR spectra were recorded on a Bruker Vertex 60 FT-IR spectrometer. IR spectrum for **9** was recorded on a Shimadzu IRAffinity-1. Electrospray ionization (ESI) mass spectra (for **8**) were obtained on a Bruker maXis spectrometer equipped with an ESI source. The instrument was operated in positive ion mode using an  $m/z$  range of 50–1200. The nebulizer and drying gas flows were set to 1.0 bar and 4.0 L min<sup>-1</sup>, respectively. For high resolution electrospray ionization (HRESI+), the studied compound was dissolved in MeOH. <sup>1</sup>H- and <sup>13</sup>C{<sup>1</sup>H} NMR spectra were measured on a Bruker Avance 400 spectrometer in (CD<sub>3</sub>)<sub>2</sub>SO at 298 K; the residual solvent signal was used as the internal standard.

**Synthesis of [S(bPh)Ph]<sub>4</sub>[β-Mo<sub>8</sub>O<sub>26</sub>] (1):** Solid [S(bPh)Ph](OTf) (0.038 g, 9.3·10<sup>-5</sup> mol) was added to the solution of (Bu<sub>4</sub>N)<sub>4</sub>[β-Mo<sub>8</sub>O<sub>26</sub>] (0.050 g, 2.3·10<sup>-5</sup> mol) in 3 mL of DMF under gentle stirring. Formation of the crystalline product was found after several minutes after mixing. Crystals suitable for SCXRD were found after keeping of the mother liquor overnight. Crystalline product was washed with Et<sub>2</sub>O (2 portions of 5 mL) and dried in air overnight. Yield 0.048 g (92% based on initial octamolybdate) Calcd. for C<sub>72</sub>H<sub>52</sub>Mo<sub>8</sub>O<sub>26</sub>S<sub>4</sub> C, H, N, S(%): 38.8, 2.4, 5.8; found C, H, N(%): 38.5; 2.4; 0; 6.1. The use of N-methyl-2-pyrrolidone (NMP) instead of DMF gives 37 mg of the titled compound. IR (KBr, cm<sup>-1</sup>): 3110(w), 3086(m), 3070(w), 3055(w), 3024(w), 3002(w), 2662(w), 2930(w), 2874(w), 1578(w), 1560(w), 1541(w), 1505(w), 1474(m), 14569w), 1447(s), 1422(m), 1402(w), 1301(w), 1290(w), 1274(w), 1261(w), 1222(w), 1180(w), 1163(w), 1126(w), 1060(w), 1049(w), 1033(w), 1022(w), 1000(m), 950(vs), 932(s), 918(vs), 905(vs), 884(s), 839(vs), 808(m), 786(m), 770(vs), 759(vs), 749(s), 739(vs), 718(vs), 703(vs), 680(s), 660(s), 612(s), 566(m), 550(s), 521(vs), 502(s), 486(s), 474(s), 457(s), 424(s), 413(s). IR spectra of the products isolated from DMF and NMP are identical.

**Synthesis of [S(bPh)Ph]<sub>4</sub>[α-Mo<sub>8</sub>O<sub>26</sub>]·2DMSO (2):** Solid [S(bPh)Ph](OTf) (0.038 g, 9.3·10<sup>-5</sup> mol) was added to the solution of (Bu<sub>4</sub>N)<sub>4</sub>[β-Mo<sub>8</sub>O<sub>26</sub>] (0.050 g, 2.3·10<sup>-5</sup> mol) in 3 mL of DMSO under gentle stirring. The resulted solution was transferred into the *i*-PrOH atmosphere. After 2-3 days a crop of crystals has been analyzed with SCXRD. We found some crystals of **2** together with crystals of [Na(DMSO)<sub>6</sub>][S(bPh)Ph]<sub>2</sub>[Na(β-Mo<sub>8</sub>O<sub>26</sub>)]·*x*DMSO which is a major phase under such conditions.

**Synthesis of  $(\text{Bu}_4\text{N})_2[\text{S}(\text{bPh})\text{Mes}]_2[\alpha\text{-Mo}_8\text{O}_{26}]\cdot 2\text{DMF}$  (3):** Solid  $[\text{S}(\text{bPh})\text{Mes}](\text{OTf})$  (0.013 g,  $2.9\cdot 10^{-5}$  mol) was added to the solution of  $(\text{Bu}_4\text{N})_4[\beta\text{-Mo}_8\text{O}_{26}]$  (0.015 g,  $7\cdot 10^{-6}$  mol) in 1 mL of DMF under gentle stirring. The resulted solution was transferred into the  $\text{Et}_2\text{O}$  atmosphere. Crystalline product was washed with  $\text{Et}_2\text{O}$  (2 portions of 1 mL) and dried in air overnight. Yield 0.012 g (70% based on initial octamolybdate). Calcd. for  $\text{C}_{80}\text{H}_{124}\text{Mo}_8\text{N}_4\text{O}_{28}\text{S}_2$  C, H, N, S(%): 39.7, 2.3, 5.2, 2.7; found C, H, N, S(%): 39.7, 2.6, 5.5, 2.8.

**Synthesis of  $[\text{S}(\text{bPh})\text{Mes}]_4[\beta\text{-Mo}_8\text{O}_{26}]\cdot 4\text{DMF}\cdot 0.6\text{H}_2\text{O}$  (4):** Solid  $[\text{S}(\text{bPh})\text{Mes}](\text{OTf})$  (0.042 g,  $9.3\cdot 10^{-5}$  mol) was added to the solution of  $(\text{Bu}_4\text{N})_4[\beta\text{-Mo}_8\text{O}_{26}]$  (0.050 g,  $2.3\cdot 10^{-5}$  mol) in 3 mL of DMF under gentle stirring. The resulted solution was transferred into the  $\text{Et}_2\text{O}$  atmosphere. Crystalline product was washed with  $\text{Et}_2\text{O}$  (2 portions of 5 mL) and dried in air overnight. Yield 0.036 g (57% based on initial octamolybdate). Calcd. for  $\text{C}_{80}\text{H}_{124}\text{Mo}_8\text{N}_4\text{O}_{28}\text{S}_2$  (without DMF and  $\text{H}_2\text{O}$  molecules) C, H, N, S(%): 39.7, 2.3, 5.2, 2.7; found C, H, N, S(%): 39.7, 2.6, 5.5, 2.8. IR (KBr,  $\text{cm}^{-1}$ ): 3423(wide), 3087(w), 3080(m), 3047(w), 3000(w), 2971(w), 2927(w), 2878(w), 2852(w), 1665(m), 1595(m), 1567(m), 1508(w), 1478(w), 1468(m), 1446(s), 1420(m), 1406(m), 1375(w), 1299(m), 1279(w), 1249(w), 1227(w), 1162(w), 1132(w), 1058(w), 1051(w), 1030(w), 940(vs), 909(vs), 883(s), 837(vs), 786(m), 758(s), 718(vs), 704(vs), 672(s), 612(m), 576(w), 555(m), 516(m), 493(w), 472(m), 452(w).

**Synthesis of  $(\text{Bu}_4\text{N})_2[\text{S}(\text{bPh})\text{PhBr}]_2[\beta\text{-Mo}_8\text{O}_{26}]\cdot 2\text{DMF}$  (5):** Solid  $[\text{S}(\text{bPh})\text{PhBr}](\text{OTf})$  (0.045 g,  $9.2\cdot 10^{-5}$  mol) was added to the solution of  $(\text{Bu}_4\text{N})_4[\beta\text{-Mo}_8\text{O}_{26}]$  (0.050 g,  $2.3\cdot 10^{-5}$  mol) in 3 mL of DMF under gentle stirring. The resulted solution was transferred into the  $\text{Et}_2\text{O}$  atmosphere. Crystalline product was washed with  $\text{Et}_2\text{O}$  (2 portions of 5 mL) and dried in air overnight. Yield 0.045 g of crystalline product. According to the analysis this is a mixture of 4:1 and 2:2:1 complexes. Calcd. for  $\text{Br}_3\text{C}_{70}\text{H}_{72}\text{Mo}_8\text{NO}_{26}\text{S}_3$  (3:1, without solvate DMF) C, H, N, S(%): 34.4, 3.0, 0.6, 3.9; found C, H, N, S(%): 34.0; 2.5; 0.7; 4.4. The use of N-methylpyrrolidone instead of DMF gives 30 mg (50% based on initial octamolybdate) of the titled compound. According to the elemental analysis this is 4:1 complex of  $[\text{S}(\text{bPh})\text{PhBr}]_2[\beta\text{-Mo}_8\text{O}_{26}]$ -formula. Calcd. for  $\text{Br}_4\text{C}_{72}\text{H}_{48}\text{Mo}_8\text{O}_{26}\text{S}_4$  (without solvate NMP) C, H, N, S(%): 34.0, 1.9, 0, 5.0; found C, H, N, S(%): 33.7, 2.5, 0, 4.4. IR (KBr,  $\text{cm}^{-1}$ ): 3074(m), 3057(m), 3004(w), 2960(w), 2932(w), 2871(w), 1679(m), 1664(w), 1623(w), 1565(m), 1478(sh), 1469(m), 1443(m), 1428(m), 1389(m), 1292(w), 1278(w), 1180(w), 1160(w), 1125(w), 1115(w), 1090(w), 1066(m), 998(s), 941(vs), 923(s), 909(vs), 843(s), 808(m), 785(m), 765(s), 730(s), 704(vs), 688(s), 659(s), 623(m), 612(m), 565(sh), 554(m), 531(m), 504(m), 472(w), 451(w), 411(m).

**Synthesis of  $(\text{Bu}_4\text{N})_2[\text{S}(\text{bPh})\text{PhF}]_2[\beta\text{-Mo}_8\text{O}_{26}]\cdot 2\text{DMF}$  (6):** Solid  $[\text{S}(\text{bPh})\text{PhF}](\text{OTf})$  (0.039 g,  $9.2\cdot 10^{-5}$  mol) was added to the solution of  $(\text{Bu}_4\text{N})_4[\beta\text{-Mo}_8\text{O}_{26}]$  (0.050 g,  $2.3\cdot 10^{-5}$  mol) in 3 mL of DMF under gentle stirring. The resulted solution was transferred into the  $\text{Et}_2\text{O}$  atmosphere.

Crystalline product was washed with Et<sub>2</sub>O (2 portions of 5 mL) and dried in air overnight. Yield 0.043 g of crystalline product (78% based on initial octamolybdate). Calcd. for C<sub>74</sub>F<sub>2</sub>H<sub>110</sub>Mo<sub>8</sub>N<sub>4</sub>O<sub>28</sub>S<sub>2</sub> C, H, N, S(%): 37.5, 4.7, 2.4, 2.7; found C, H, N, S(%): 37.1; 4.2; 2.0; 2.2. IR (KBr, cm<sup>-1</sup>): 3087(m), 3055(m), 3005(w), 2960(m), 2931(m), 2874(m), 1681(sh), 1673(s), 1593(sh), 1583(s), 1488(s), 1445(m), 1424(m), 1401(m), 1383(m), 1293(m), 1274(w), 1238(s), 1160(s), 1131(w), 1096(m), 1063(m), 1032(w), 1013(w), 1009(m), 945(vs), 911(vs), 862(sh), 843(vs), 800(vs), 771(sh), 762(vs), 731(s), 710(s), 693(s), 663(vs), 625(m), 611(m), 558(m), 480(m), 450(w), 422(m), 409(m).

**Synthesis of (Bu<sub>4</sub>N)<sub>2</sub>[Se(bPh)Ph]<sub>2</sub>[β-Mo<sub>8</sub>O<sub>26</sub>] (7):** Solid [Se(bPh)Ph](OTf) (0.014 g, 2.9·10<sup>-5</sup> mol) was added to the solution of (Bu<sub>4</sub>N)<sub>4</sub>[β-Mo<sub>8</sub>O<sub>26</sub>] (0.015 g, 7·10<sup>-6</sup> mol) in 3 mL of DMF under gentle stirring. The resulted soluting was transferred into the Et<sub>2</sub>O atmosphere. Crystalline product was washed with Et<sub>2</sub>O (2 portions of 1 mL) and dried in air overnight. Yield – several crystals.

**Synthesis of [Te(bPh)Ph]<sub>4</sub>[β-Mo<sub>8</sub>O<sub>26</sub>] (9):** The solution of [Te(bPh)Ph](OTf) (14 mg, 0.027 mmol) in acetonitrile (1 mL) was added dropwise to the stirred solution of (Bu<sub>4</sub>N)<sub>4</sub>[β-Mo<sub>8</sub>O<sub>26</sub>] (15 mg, 0.007 mmol) in acetonitrile (1 mL) and the resulting mixture was stirred at RT for 15 min. The precipitate which formed, was filtered off, washed with acetonitrile (2 x 0.5 mL), and dried at 50 °C in air. The product isolated as colorless crystalline solid. Yield: 76% (13 mg). M.p.: 335–340 °C (decomp.). <sup>1</sup>H NMR (400.13 MHz, (CD<sub>3</sub>)<sub>2</sub>SO): δ = 8.30 (d, <sup>3</sup>J<sub>HH</sub> = 7.6 Hz, 2H, Ar), 8.20 (d, <sup>3</sup>J<sub>HH</sub> = 7.2 Hz, 2H, Ar), 7.77 (t, <sup>3</sup>J<sub>HH</sub> = 7.7 Hz, 2H, Ar), 7.62 (t, <sup>3</sup>J<sub>HH</sub> = 7.2 Hz, 2H, Ar), 7.50 (d, <sup>3</sup>J<sub>HH</sub> = 8.0 Hz, 2H, Ar), 7.42 – 7.36 (m, 3H, Ar). <sup>13</sup>C{<sup>1</sup>H} NMR (101.61 MHz, (CD<sub>3</sub>)<sub>2</sub>SO): δ = 147.0, 135.6, 133.8, 133.2, 132.4, 131.3, 130.5, 130.0, 125.7 (Ar). HR-ESI(+) (ESI-TOF): *m/z* calcd for C<sub>18</sub>H<sub>13</sub>Te<sup>+</sup>: 359.0074; found: 359.0071. The crystals of [Te(bPh)Ph]<sub>4</sub>[β-Mo<sub>8</sub>O<sub>26</sub>]·2CH<sub>3</sub>OH (**[9]·2CH<sub>3</sub>OH**) were grown from the solution of crude product in MeOH : DMF mixture 1 : 1, v/v. Calcd. for [Te(bPh)Ph]<sub>4</sub>[β-Mo<sub>8</sub>O<sub>26</sub>] C, H(%): 33.2; 2.0; found C, H(%): 33.3; 1.7. IR (ATR, cm<sup>-1</sup>): 3057(w), 1474(w), 1438(m), 995(m), 940(vs), 915(m), 890(vs), 877(vs), 835(s), 781(w), 743(vs), 701(vs), 684(s), 654(s), 612(m), 554(m), 520(m), 474(m), 451ms), 429(w), 412(s).

**Synthesis of (Bu<sub>4</sub>N)<sub>2</sub>[Te(bPh)Ph]<sub>2</sub>[β-Mo<sub>8</sub>O<sub>26</sub>] (8):** The crystals of titled compound were grown from the mixture of [Te(bPh)Ph](OTf) (5 mg, 0.01 mmol) and (Bu<sub>4</sub>N)<sub>4</sub>[β-Mo<sub>8</sub>O<sub>26</sub>] (6 mg, 0.003 mmol) in in DMSO during hexane vapor diffusion. Yield – several crystals.

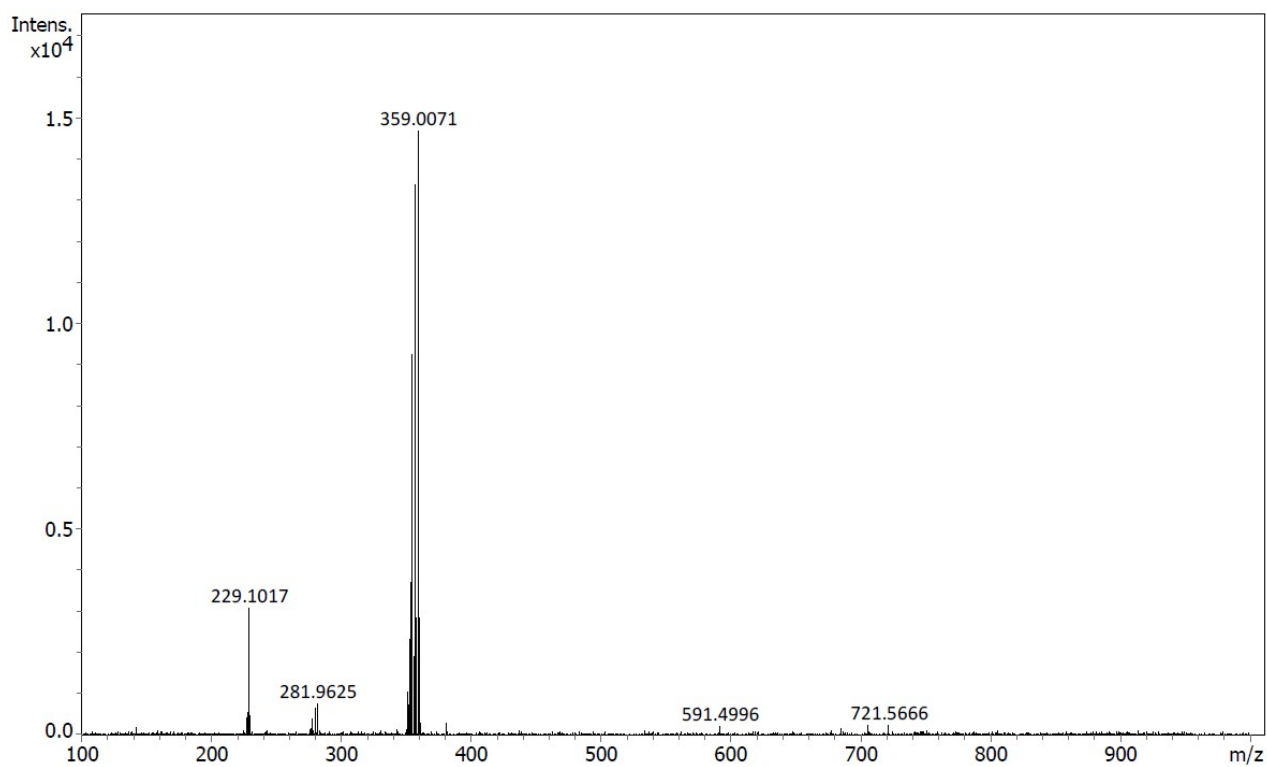

**Figure S1.** HR-ESI(+) data for the solution of  $[\text{Te}(\text{bpy})\text{Ph}]_4[\beta\text{-Mo}_8\text{O}_{26}]$  in MeOH.

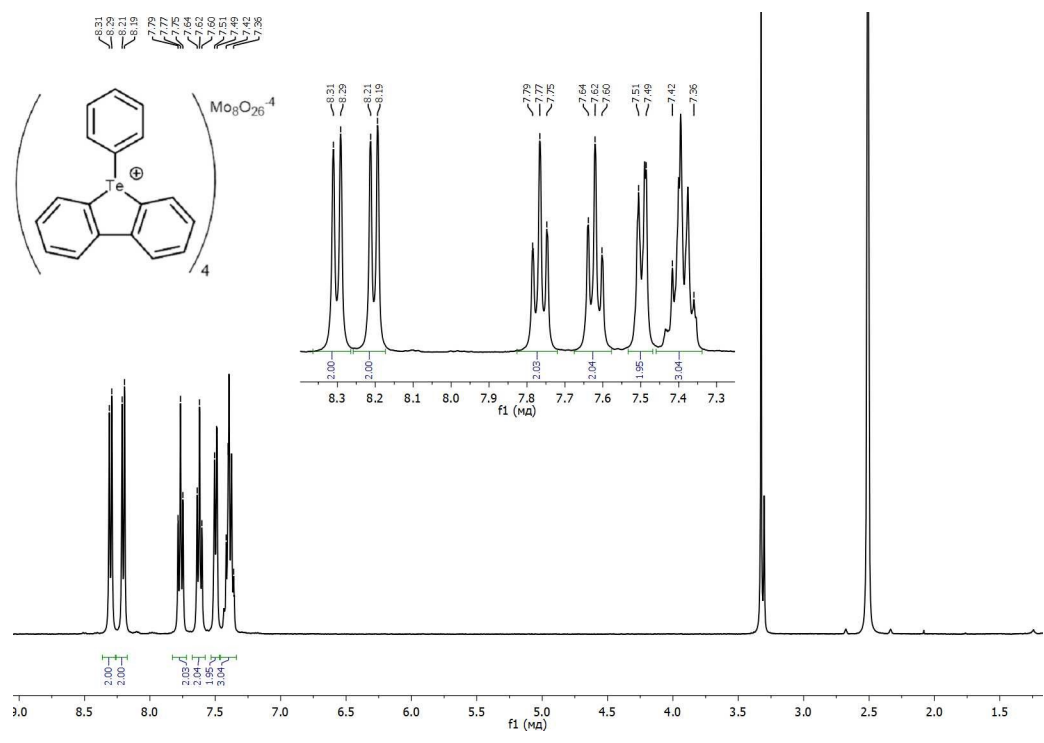

Figure S2.  $^1\text{H}$  NMR spectrum of **8** in  $\text{d}^6\text{-DMSO}$ .

Figure S3.  $^{13}\text{C}$  NMR spectrum of **8** in  $\text{d}^6\text{-DMSO}$ .

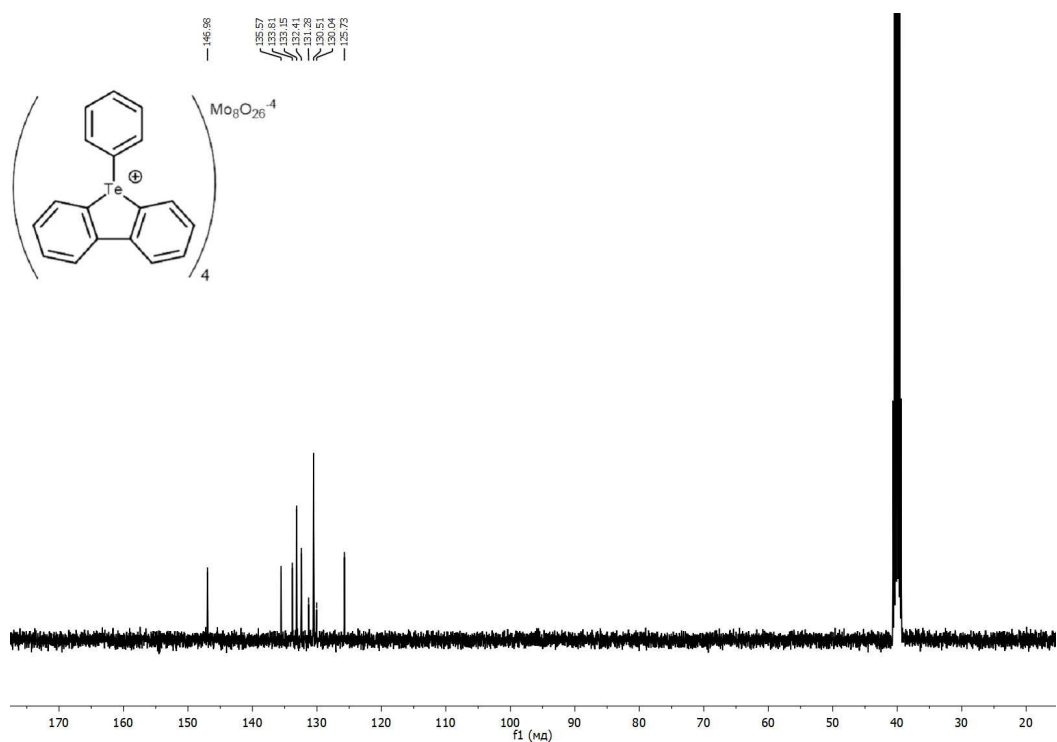

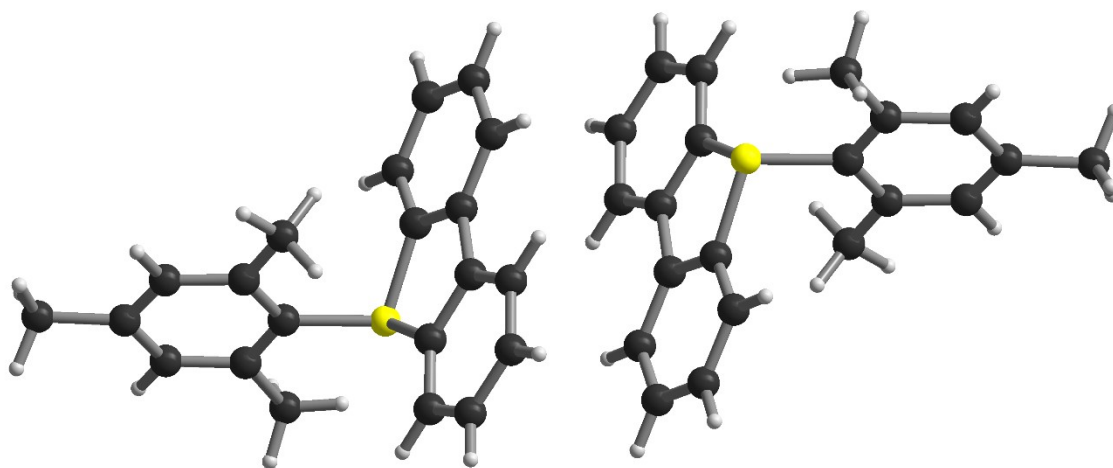

**Figure S4.**  $\pi$ - $\pi$  stacked dimer of  $[\text{S}(\text{bPh})\text{Mes}]^+$  cations in the crystal structure of **3**.

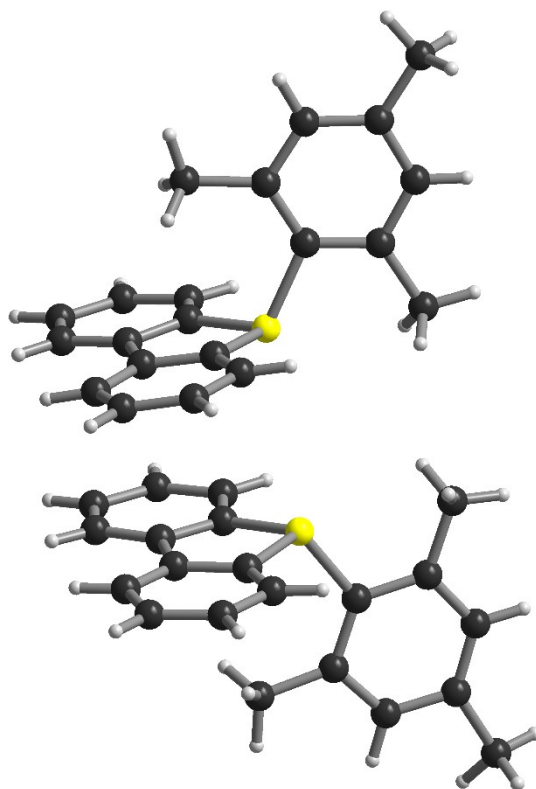

**Figure S5.**  $\pi$ - $\pi$  stacked dimer of  $[\text{S}(\text{bPh})\text{Mes}]^+$  cations in the crystal structure of **4**.



## X-ray single-crystal diffraction studies

The diffraction data for **1** - **7** were collected on a Bruker D8 Venture diffractometer with a CMOS PHOTON III detector and I $\mu$ S 3.0 source (Mo K $\alpha$  radiation,  $\lambda = 0.71073$  Å) at 150 K. The  $\phi$ - and  $\omega$ -scan techniques were employed. Absorption correction was applied by SADABS (Bruker Apex3 software suite: Apex3, SADABS-2016/2 and SAINT, version 2018.7-2; Bruker AXS Inc.: Madison, WI, 2017). The structures were solved by SHELXT<sup>4</sup> and refined by full-matrix least-squares treatment against  $|F|^2$  in anisotropic approximation with SHELX 2019/3<sup>5</sup> in ShelXle program<sup>6</sup>.

The diffraction data for **8** – [**9**] $\cdot$ 2CH<sub>3</sub>OH were collected on a «SuperNova» (Agilent Technologies) diffractometer with monochromated CuK $\alpha$  radiation. Crystals were kept at 100(2) K during data collection. Structures have been solved by the Superflip<sup>789</sup>, and the ShelXT<sup>4</sup> solution programs using Charge Flipping and Intrinsic Phasing and refined by means of the ShelXL<sup>5</sup> program incorporated in the OLEX2 program package<sup>10</sup>. H-atoms were refined in geometrically calculated positions.

CCDC 2381722 (**1**), 2381723 (**2**), 2381724 (**3**), 2381725 (**4**), 2381728 (**5**), 2381727 (**6**), 2381726 (**7**), 2358696 (**8**), 2358690 (**9**), contain the supplementary crystallographic data. These data can be obtained free of charge via <http://www.ccdc.cam.ac.uk/conts/retrieving.html>, or from the Cambridge Crystallographic Data Centre, 12 Union Road, Cambridge CB2 1EZ, UK; fax: (+44) 1223-336-033; or e-mail: [deposit@ccdc.cam.ac.uk](mailto:deposit@ccdc.cam.ac.uk).

**Table S1.** SCXRD Experimental details

|                                                                                     | <b>1</b>                                                                                                                                            | <b>2</b>                                                                                                                                            | <b>3</b>                                                                                                                                            | <b>4</b>                                                                                                                                        |
|-------------------------------------------------------------------------------------|-----------------------------------------------------------------------------------------------------------------------------------------------------|-----------------------------------------------------------------------------------------------------------------------------------------------------|-----------------------------------------------------------------------------------------------------------------------------------------------------|-------------------------------------------------------------------------------------------------------------------------------------------------|
| Chemical formula                                                                    | C <sub>72</sub> H <sub>52</sub> Mo <sub>8</sub> O <sub>26</sub> S <sub>4</sub>                                                                      | C <sub>76</sub> H <sub>64</sub> Mo <sub>8</sub> O <sub>28</sub> S <sub>6</sub>                                                                      | C <sub>80</sub> H <sub>124</sub> Mo <sub>8</sub> N <sub>4</sub> O <sub>28</sub> S <sub>2</sub>                                                      | C <sub>96</sub> H <sub>104</sub> Mo <sub>8</sub> N <sub>4</sub> O <sub>30.60</sub> S <sub>4</sub>                                               |
| $M_r$                                                                               | 2228.89                                                                                                                                             | 2385.15                                                                                                                                             | 2421.46                                                                                                                                             | 2699.19                                                                                                                                         |
| Crystal system, space group                                                         | Triclinic, $P\bar{1}$                                                                                                                               | Triclinic, $P\bar{1}$                                                                                                                               | Monoclinic, $P2_1/c$                                                                                                                                | Monoclinic, $P2_1/n$                                                                                                                            |
| Temperature (K)                                                                     | 150                                                                                                                                                 | 150                                                                                                                                                 | 150                                                                                                                                                 | 150                                                                                                                                             |
| $a, b, c$ (Å)                                                                       | 13.1211 (3),<br>16.1534 (4),<br>18.7995 (4)                                                                                                         | 12.1379 (10),<br>13.0829 (13),<br>14.3749 (14)                                                                                                      | 14.0874 (2), 22.1111 (3),<br>15.9464 (2)                                                                                                            | 18.3451 (5), 14.3426 (4),<br>20.4131 (6)                                                                                                        |
| $\alpha, \beta, \gamma$ (°)                                                         | 87.069 (1), 77.591<br>(1), 67.982 (1)                                                                                                               | 66.691 (3), 83.977<br>(3), 72.575 (3)                                                                                                               | 90, 107.361 (1), 90                                                                                                                                 | 90, 109.041 (1), 90                                                                                                                             |
| $V$ (Å <sup>3</sup> )                                                               | 3605.75 (15)                                                                                                                                        | 2000.0 (3)                                                                                                                                          | 4740.83 (11)                                                                                                                                        | 5077.1 (2)                                                                                                                                      |
| $Z$                                                                                 | 2                                                                                                                                                   | 1                                                                                                                                                   | 2                                                                                                                                                   | 2                                                                                                                                               |
| Radiation type                                                                      | Mo $K\alpha$                                                                                                                                        | Mo $K\alpha$                                                                                                                                        | Mo $K\alpha$                                                                                                                                        | Mo $K\alpha$                                                                                                                                    |
| $\mu$ (mm <sup>-1</sup> )                                                           | 1.54                                                                                                                                                | 1.45                                                                                                                                                | 1.14                                                                                                                                                | 1.12                                                                                                                                            |
| Crystal size (mm)                                                                   | 0.65 × 0.10 × 0.10                                                                                                                                  | 0.12 × 0.10 × 0.08                                                                                                                                  | 0.14 × 0.08 × 0.07                                                                                                                                  | 0.15 × 0.10 × 0.03                                                                                                                              |
| Diffractometer                                                                      | Bruker D8 Venture diffractometer                                                                                                                    | Bruker D8 Venture diffractometer                                                                                                                    | Bruker D8 Venture diffractometer                                                                                                                    | Bruker D8 Venture diffractometer                                                                                                                |
| Absorption correction                                                               | Multi-scan<br><i>SADABS</i> 2016/2:<br>Krause, L., Herbst-<br>Irmer, R., Sheldrick<br>G.M. & Stalke D.,<br><i>J. Appl. Cryst.</i> 48<br>(2015) 3-10 | Multi-scan<br><i>SADABS</i> 2016/2:<br>Krause, L., Herbst-<br>Irmer, R., Sheldrick<br>G.M. & Stalke D., J.<br><i>Appl. Cryst.</i> 48<br>(2015) 3-10 | Multi-scan<br><i>SADABS</i> 2016/2:<br>Krause, L., Herbst-<br>Irmer, R., Sheldrick<br>G.M. & Stalke D., J.<br><i>Appl. Cryst.</i> 48 (2015)<br>3-10 | Multi-scan<br><i>SADABS</i> 2016/2: Krause,<br>L., Herbst-Irmer, R.,<br>Sheldrick G.M. & Stalke<br>D., <i>J. Appl. Cryst.</i> 48<br>(2015) 3-10 |
| $T_{\min}, T_{\max}$                                                                | 0.701, 0.747                                                                                                                                        | 0.600, 0.746                                                                                                                                        | 0.656, 0.746                                                                                                                                        | 0.642, 0.745                                                                                                                                    |
| No. of measured,<br>independent and<br>observed [ $I > 2\sigma(I)$ ]<br>reflections | 76236, 24939,<br>18317                                                                                                                              | 16045, 8881, 6518                                                                                                                                   | 55259, 14149, 9649                                                                                                                                  | 55494, 12600, 8357                                                                                                                              |
| $R_{\text{int}}$                                                                    | 0.039                                                                                                                                               | 0.046                                                                                                                                               | 0.082                                                                                                                                               | 0.090                                                                                                                                           |
| $\theta$ values (°)                                                                 | $\theta_{\text{max}} = 35.0,$<br>$\theta_{\text{min}} = 1.7$                                                                                        | $\theta_{\text{max}} = 27.9,$<br>$\theta_{\text{min}} = 2.4$                                                                                        | $\theta_{\text{max}} = 30.5,$<br>$\theta_{\text{min}} = 2.5$                                                                                        | $\theta_{\text{max}} = 28.3,$<br>$\theta_{\text{min}} = 1.8$                                                                                    |
| $(\sin \theta/\lambda)_{\text{max}}$ (Å <sup>-1</sup> )                             | 0.808                                                                                                                                               | 0.659                                                                                                                                               | 0.715                                                                                                                                               | 0.667                                                                                                                                           |
| Range of $h, k, l$                                                                  | -17 ≤ $h$ ≤ 21,<br>-23 ≤ $k$ ≤ 24,<br>-27 ≤ $l$ ≤ 25                                                                                                | -15 ≤ $h$ ≤ 12,<br>-17 ≤ $k$ ≤ 16,<br>-18 ≤ $l$ ≤ 18                                                                                                | -17 ≤ $h$ ≤ 20,<br>-28 ≤ $k$ ≤ 31,<br>-22 ≤ $l$ ≤ 19                                                                                                | -24 ≤ $h$ ≤ 23,<br>-19 ≤ $k$ ≤ 18,<br>-27 ≤ $l$ ≤ 27                                                                                            |
| $R[F^2 > 2\sigma(F^2)],$<br>$wR(F^2), S$                                            | 0.037, 0.084, 1.06                                                                                                                                  | 0.052, 0.134, 1.01                                                                                                                                  | 0.041, 0.076, 0.96                                                                                                                                  | 0.048, 0.102, 1.07                                                                                                                              |
| No. of reflections                                                                  | 24939                                                                                                                                               | 8881                                                                                                                                                | 14149                                                                                                                                               | 12600                                                                                                                                           |
| No. of parameters                                                                   | 991                                                                                                                                                 | 533                                                                                                                                                 | 569                                                                                                                                                 | 638                                                                                                                                             |
| Weighting scheme                                                                    | $w = 1/[\sigma^2(F_o^2) +$<br>$(0.0278P)^2 +$<br>$0.4343P]$<br>where $P = (F_o^2 +$<br>$2F_c^2)/3$                                                  | $w = 1/[\sigma^2(F_o^2) +$<br>$(0.0683P)^2]$<br>where $P = (F_o^2 +$<br>$2F_c^2)/3$                                                                 | $w = 1/[\sigma^2(F_o^2) +$<br>$(0.0271P)^2]$<br>where $P = (F_o^2 + 2F_c^2)/3$                                                                      | $w = 1/[\sigma^2(F_o^2) +$<br>$(0.0296P)^2 + 0.0242P]$<br>where $P = (F_o^2 + 2F_c^2)/3$                                                        |
| $\Delta\rho_{\text{max}}, \Delta\rho_{\text{min}}$ (e Å <sup>-3</sup> )             | 0.68, -0.82                                                                                                                                         | 1.18, -1.32                                                                                                                                         | 0.69, -0.76                                                                                                                                         | 0.75, -0.78                                                                                                                                     |

|                                                                            | 5                                                                                                                                                   | 6                                                                                                                                                   | 7                                                                                                                                                   | 8                                                                                                                                                                                                                  |
|----------------------------------------------------------------------------|-----------------------------------------------------------------------------------------------------------------------------------------------------|-----------------------------------------------------------------------------------------------------------------------------------------------------|-----------------------------------------------------------------------------------------------------------------------------------------------------|--------------------------------------------------------------------------------------------------------------------------------------------------------------------------------------------------------------------|
| Chemical formula                                                           | C <sub>74</sub> H <sub>110</sub> Br <sub>2</sub> Mo <sub>8</sub> N <sub>4</sub> O <sub>2</sub><br>8S <sub>2</sub>                                   | C <sub>74</sub> H <sub>110</sub> F <sub>2</sub> Mo <sub>8</sub> N <sub>4</sub> O <sub>28</sub> S<br>2                                               | C <sub>68</sub> H <sub>98</sub> Mo <sub>8</sub> N <sub>2</sub> O <sub>26</sub> Se <sub>2</sub>                                                      | C <sub>68</sub> H <sub>98</sub> Mo <sub>8</sub> N <sub>2</sub> O <sub>26</sub> Te <sub>2</sub>                                                                                                                     |
| $M_r$                                                                      | 2495.11                                                                                                                                             | 2373.29                                                                                                                                             | 2284.92                                                                                                                                             | 2382.20                                                                                                                                                                                                            |
| Crystal system, space group                                                | Orthorhombic, <i>Pbcn</i>                                                                                                                           | Orthorhombic, <i>Pbcn</i>                                                                                                                           | Monoclinic, <i>P2<sub>1</sub>/n</i>                                                                                                                 | Monoclinic, <i>P2<sub>1</sub>/n</i>                                                                                                                                                                                |
| Temperature (K)                                                            | 150                                                                                                                                                 | 150                                                                                                                                                 | 150                                                                                                                                                 | 100                                                                                                                                                                                                                |
| $a, b, c$ (Å)                                                              | 16.1172 (4),<br>19.3082 (5),<br>28.7181 (5)                                                                                                         | 16.0410 (4), 19.0021<br>(5), 28.9048 (7)                                                                                                            | 15.1096 (9), 15.4192 (8),<br>18.0328 (9)                                                                                                            | 14.3189 (2), 15.3993 (2),<br>18.8558 (3)                                                                                                                                                                           |
| $\alpha, \beta, \gamma$ (°)                                                | 90, 90, 90                                                                                                                                          | 90, 90, 90                                                                                                                                          | 90, 105.383 (2), 90                                                                                                                                 | 90, 105.413 (2), 90                                                                                                                                                                                                |
| $V$ (Å <sup>3</sup> )                                                      | 8936.9 (4)                                                                                                                                          | 8810.5 (4)                                                                                                                                          | 4050.7 (4)                                                                                                                                          | 4008.19 (11)                                                                                                                                                                                                       |
| $Z$                                                                        | 4                                                                                                                                                   | 4                                                                                                                                                   | 2                                                                                                                                                   | 4                                                                                                                                                                                                                  |
| Radiation type                                                             | Mo <i>K</i> $\alpha$                                                                                                                                | Mo <i>K</i> $\alpha$                                                                                                                                | Mo <i>K</i> $\alpha$                                                                                                                                | Cu <i>K</i> $\alpha$                                                                                                                                                                                               |
| $\mu$ (mm <sup>-1</sup> )                                                  | 2.10                                                                                                                                                | 1.23                                                                                                                                                | 2.17                                                                                                                                                | 16.18                                                                                                                                                                                                              |
| Crystal size (mm)                                                          | 0.13 × 0.05 × 0.04                                                                                                                                  | 0.11 × 0.04 × 0.04                                                                                                                                  | 0.20 × 0.12 × 0.05                                                                                                                                  | 0.18 × 0.1 × 0.06                                                                                                                                                                                                  |
| Diffractometer                                                             | Bruker D8 Venture diffractometer                                                                                                                    | Bruker D8 Venture diffractometer                                                                                                                    | Bruker D8 Venture diffractometer                                                                                                                    | SuperNova, Single source at offset/far, HyPix3000                                                                                                                                                                  |
| Absorption correction                                                      | Multi-scan<br><i>SADABS</i> 2016/2:<br>Krause, L., Herbst-<br>Irmer, R., Sheldrick<br>G.M. & Stalke D.,<br><i>J. Appl. Cryst.</i> 48<br>(2015) 3-10 | Multi-scan<br><i>SADABS</i> 2016/2:<br>Krause, L., Herbst-<br>Irmer, R., Sheldrick<br>G.M. & Stalke D., J.<br><i>Appl. Cryst.</i> 48<br>(2015) 3-10 | Multi-scan<br><i>SADABS</i> 2016/2:<br>Krause, L., Herbst-<br>Irmer, R., Sheldrick<br>G.M. & Stalke D., J.<br><i>Appl. Cryst.</i> 48 (2015)<br>3-10 | Multi-scan<br><i>CrysAlis PRO</i><br>1.171.41.104a (Rigaku<br>Oxford Diffraction, 2021)<br>Empirical absorption<br>correction using spherical<br>harmonics, implemented<br>in SCALE3 ABSPACK<br>scaling algorithm. |
| $T_{\min}, T_{\max}$                                                       | 0.623, 0.746                                                                                                                                        | 0.581, 0.746                                                                                                                                        | 0.548, 0.746                                                                                                                                        | 0.570, 1.000                                                                                                                                                                                                       |
| No. of measured, independent and observed [ $I > 2\sigma(I)$ ] reflections | 82928, 10673, 7006                                                                                                                                  | 45051, 10939, 6397                                                                                                                                  | 36468, 11448, 7515                                                                                                                                  | 47163, 7227, 6689                                                                                                                                                                                                  |
| $R_{\text{int}}$                                                           | 0.113                                                                                                                                               | 0.082                                                                                                                                               | 0.085                                                                                                                                               | 0.040                                                                                                                                                                                                              |
| $\theta$ values (°)                                                        | $\theta_{\max} = 27.9,$<br>$\theta_{\min} = 2.5$                                                                                                    | $\theta_{\max} = 28.3,$<br>$\theta_{\min} = 1.7$                                                                                                    | $\theta_{\max} = 29.7,$<br>$\theta_{\min} = 2.1$                                                                                                    | $\theta_{\max} = 67.5,$<br>$\theta_{\min} = 3.5$                                                                                                                                                                   |
| $(\sin \theta/\lambda)_{\max}$ (Å <sup>-1</sup> )                          | 0.658                                                                                                                                               | 0.667                                                                                                                                               | 0.697                                                                                                                                               | 0.599                                                                                                                                                                                                              |
| Range of $h, k, l$                                                         | -21 ≤ $h$ ≤ 20,<br>-23 ≤ $k$ ≤ 25,<br>-35 ≤ $l$ ≤ 37                                                                                                | -21 ≤ $h$ ≤ 15,<br>-19 ≤ $k$ ≤ 25,<br>-36 ≤ $l$ ≤ 38                                                                                                | -21 ≤ $h$ ≤ 15,<br>-15 ≤ $k$ ≤ 21,<br>-25 ≤ $l$ ≤ 23                                                                                                | -17 ≤ $h$ ≤ 17,<br>-18 ≤ $k$ ≤ 18,<br>-22 ≤ $l$ ≤ 22                                                                                                                                                               |
| $R[F^2 > 2\sigma(F^2)],$<br>$wR(F^2), S$                                   | 0.040, 0.088, 0.99                                                                                                                                  | 0.047, 0.103, 0.97                                                                                                                                  | 0.059, 0.155, 1.01                                                                                                                                  | 0.030, 0.078, 1.05                                                                                                                                                                                                 |
| No. of reflections                                                         | 10673                                                                                                                                               | 10939                                                                                                                                               | 11448                                                                                                                                               | 7227                                                                                                                                                                                                               |
| No. of parameters                                                          | 534                                                                                                                                                 | 524                                                                                                                                                 | 478                                                                                                                                                 | 483                                                                                                                                                                                                                |
| Weighting scheme                                                           | $w = 1/[\sigma^2(F_o^2) + (0.0285P)^2]$<br>where $P = (F_o^2 + 2F_c^2)/3$                                                                           | $w = 1/[\sigma^2(F_o^2) + (0.0374P)^2]$<br>where $P = (F_o^2 + 2F_c^2)/3$                                                                           | $w = 1/[\sigma^2(F_o^2) + (0.077P)^2]$<br>where $P = (F_o^2 + 2F_c^2)/3$                                                                            | $w = 1/[\sigma^2(F_o^2) + (0.0475P)^2 + 6.1521P]$<br>where $P = (F_o^2 + 2F_c^2)/3$                                                                                                                                |
| $\Delta\rho_{\max}, \Delta\rho_{\min}$ (e Å <sup>-3</sup> )                | 0.79, -0.67                                                                                                                                         | 0.92, -0.65                                                                                                                                         | 4.21, -1.30                                                                                                                                         | 1.43, -0.95                                                                                                                                                                                                        |

|                                                                            |                                                                                                                                                                                               |
|----------------------------------------------------------------------------|-----------------------------------------------------------------------------------------------------------------------------------------------------------------------------------------------|
|                                                                            | <b>9</b>                                                                                                                                                                                      |
| Chemical formula                                                           | C <sub>74</sub> H <sub>60</sub> Mo <sub>8</sub> O <sub>28</sub> Te <sub>4</sub>                                                                                                               |
| $M_r$                                                                      | 2675.14                                                                                                                                                                                       |
| Crystal system, space group                                                | Triclinic, $P\bar{1}$                                                                                                                                                                         |
| Temperature (K)                                                            | 100                                                                                                                                                                                           |
| $a, b, c$ (Å)                                                              | 11.6145 (3), 12.9674 (2), 14.5072 (4)                                                                                                                                                         |
| $\alpha, \beta, \gamma$ (°)                                                | 65.706 (2), 79.734 (2), 76.172 (2)                                                                                                                                                            |
| $V$ (Å <sup>3</sup> )                                                      | 1925.83 (9)                                                                                                                                                                                   |
| $Z$                                                                        | 1                                                                                                                                                                                             |
| Radiation type                                                             | Cu $K\alpha$                                                                                                                                                                                  |
| $\mu$ (mm <sup>-1</sup> )                                                  | 22.74                                                                                                                                                                                         |
| Crystal size (mm)                                                          | 0.23 × 0.2 × 0.13                                                                                                                                                                             |
| Diffractometer                                                             | SuperNova, Single source at offset/far, HyPix3000                                                                                                                                             |
| Absorption correction                                                      | Multi-scan<br><i>CrysAlis PRO</i> 1.171.41.104a (Rigaku Oxford Diffraction, 2021) Empirical absorption correction using spherical harmonics, implemented in SCALE3 ABSPACK scaling algorithm. |
| $T_{\min}, T_{\max}$                                                       | 0.306, 1.000                                                                                                                                                                                  |
| No. of measured, independent and observed [ $I > 2\sigma(I)$ ] reflections | 40242, 7154, 6900                                                                                                                                                                             |
| $R_{\text{int}}$                                                           | 0.040                                                                                                                                                                                         |
| $\theta$ values (°)                                                        | $\theta_{\max} = 69.1, \theta_{\min} = 3.4$                                                                                                                                                   |
| $(\sin \theta/\lambda)_{\max}$ (Å <sup>-1</sup> )                          | 0.606                                                                                                                                                                                         |
| Range of $h, k, l$                                                         | $-14 \leq h \leq 14, -14 \leq k \leq 15, -17 \leq l \leq 17$                                                                                                                                  |
| $R[F^2 > 2\sigma(F^2)], wR(F^2), S$                                        | 0.024, 0.060, 1.02                                                                                                                                                                            |
| No. of reflections, parameters                                             | 7154, 516                                                                                                                                                                                     |
| Weighting scheme                                                           | $w = 1/[\sigma^2(F_o^2) + (0.0292P)^2 + 5.2951P]$<br>where $P = (F_o^2 + 2F_c^2)/3$                                                                                                           |
| $\Delta\rho_{\max}, \Delta\rho_{\min}$ (e Å <sup>-3</sup> )                | 1.80, -1.39                                                                                                                                                                                   |

Computer programs: *APEX3* (Bruker-AXS, 2016), *CrysAlis PRO* 1.171.41.104a (Rigaku OD, 2021), *SAINT* (Bruker-AXS, 2016), *SHELXS2014/5* (Sheldrick, 2014), *SHELXT* 2014/5 (Sheldrick, 2014), *SHELXL2019/3* (Sheldrick, 2019).

## Mass spectrometry

The high-resolution electrospray ionization mass spectrometric (HR-ESI-MS) measurements were performed at the Center of Collective Use «Mass spectrometric investigations» SB RAS. Spectra were obtained with a direct injection of liquid samples on an ESI quadrupole time-of-flight (ESI-Q-TOF) high-resolution mass spectrometer Maxis 4G (Bruker Daltonics, Germany). The spectra were recorded in the 300-3000 m/z range in negative mode.

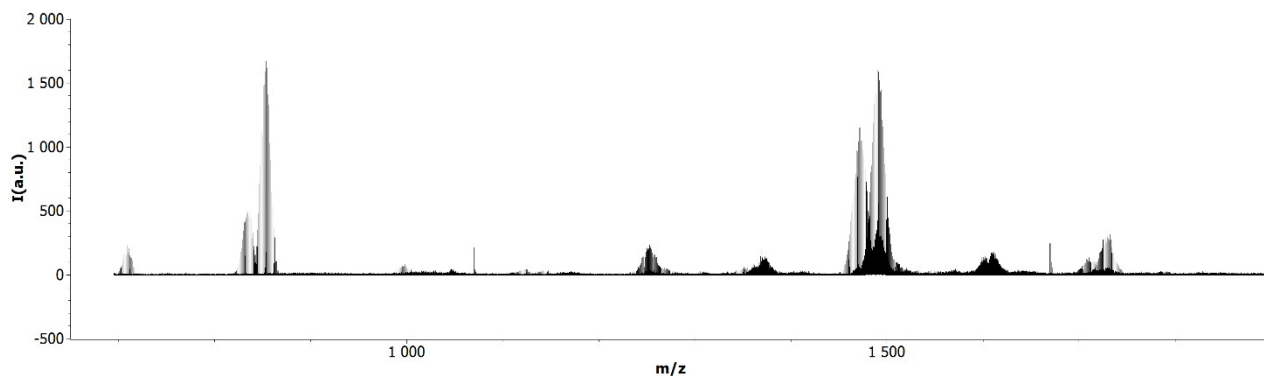

**Figure S6.** Full HR-ESI-MS(-) spectrum of **1** in CH<sub>3</sub>CN.

**Table S2.** Molecular peaks assignment

| Molecular peak                                                                           | Exp       | Calc      |
|------------------------------------------------------------------------------------------|-----------|-----------|
| $\{[\text{Mo}_4\text{O}_{13}]^{3-} + (\text{SC}_{18}\text{H}_{13})^+ + \text{H}^+\}^-$   | 853.6344  | 853.6388  |
| $\{[\text{Mo}_8\text{O}_{26}]^{4-} + 3\text{Na}^+\}^-$                                   | 1252.0861 | 1252.0833 |
| $\{[\text{Mo}_8\text{O}_{26}]^{4-} + 2\text{Na}^+ + (\text{SC}_{18}\text{H}_{13})^+\}^-$ | 1491.1681 | 1491.1679 |
| $\{[\text{Mo}_8\text{O}_{26}]^{4-} + \text{Na}^+ + 2(\text{SC}_{18}\text{H}_{13})^+\}^-$ | 1729.2519 | 1729.2522 |

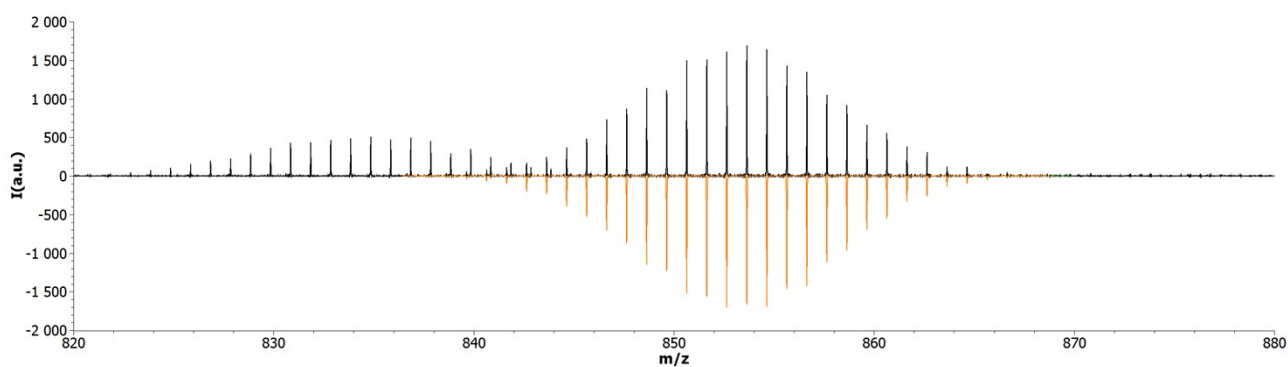

**Figure S7.** Zoomed area of HR-ESI-MS(-) spectrum of **1** between 820 – 880 m/z.

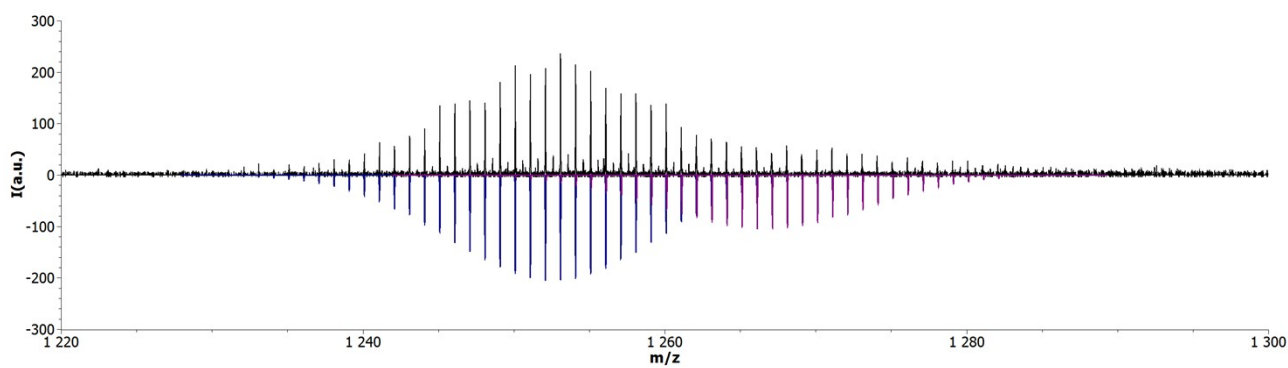

**Figure S8.** Zoomed area of HR-ESI-MS(-) spectrum of **1** between 1220 – 1300 m/z.

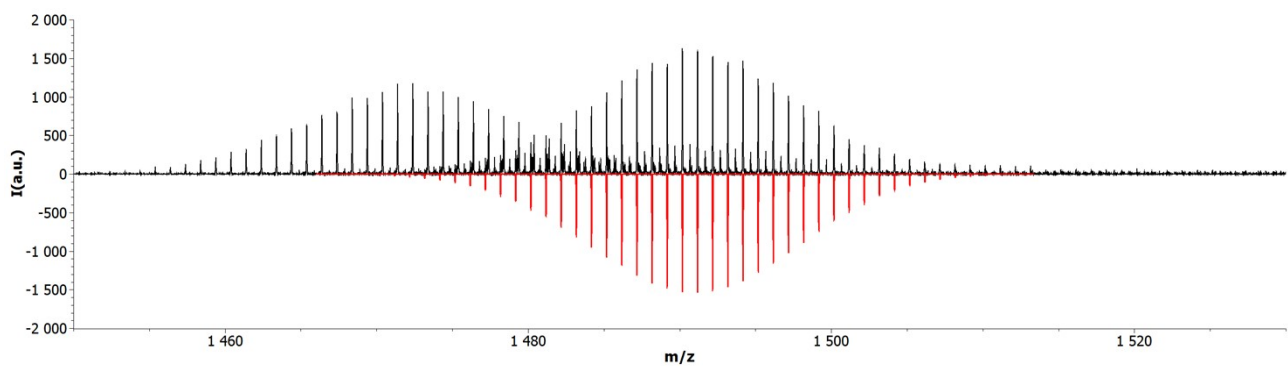

**Figure S9.** Zoomed area of HR-ESI-MS(-) spectrum of **1** between 1450 – 1530 m/z.

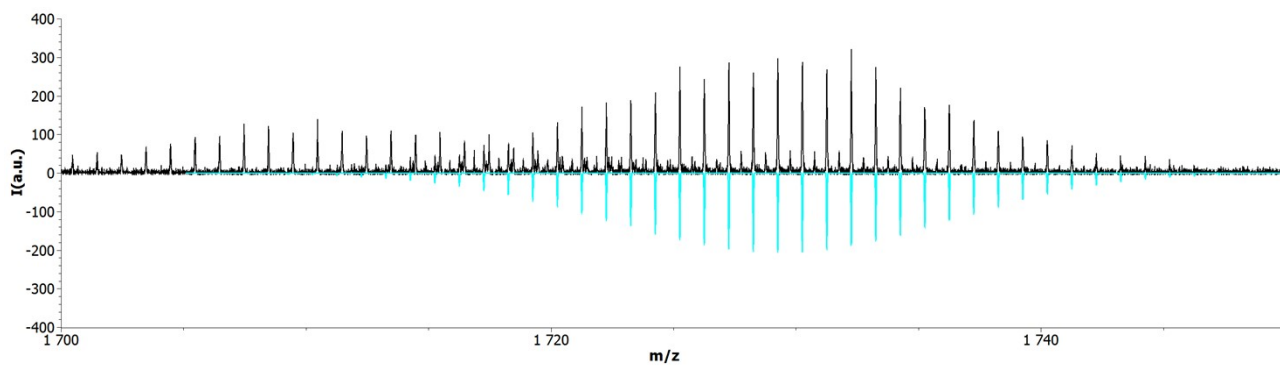

**Figure S10.** Zoomed area of HR-ESI-MS(-) spectrum of **1** between 1700 – 1750 m/z.

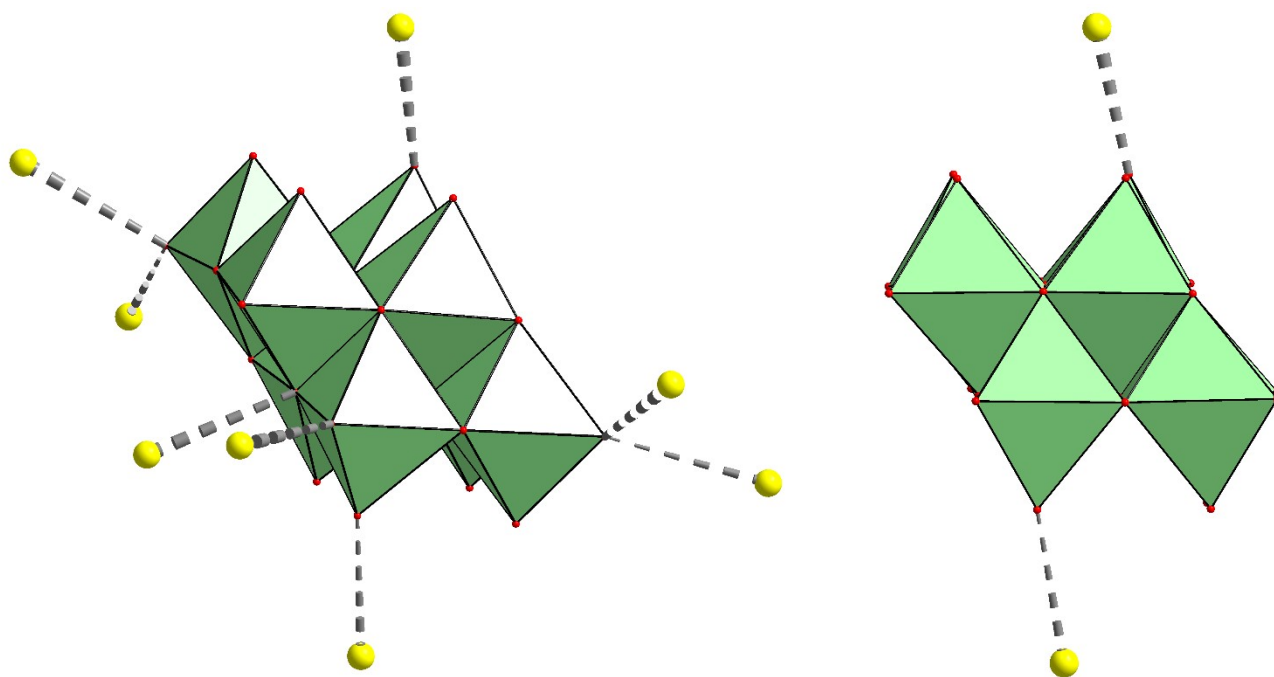

**Figure S11.**  $\sigma$ -(S<sup>IV</sup>)-hole $\cdots$ O=Mo interactions in the crystal structure of (Me<sub>3</sub>S)<sub>4</sub>[Mo<sub>8</sub>O<sub>26</sub>] (CCDC 907956, DEPNUM)



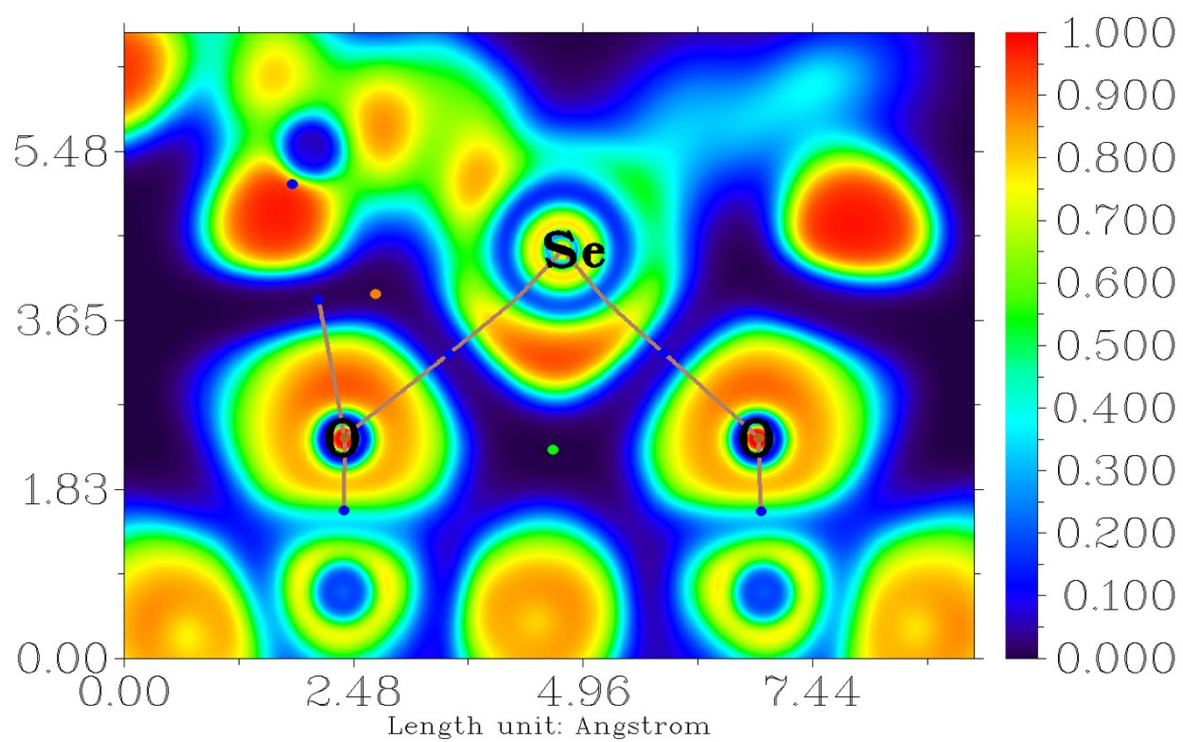

**Figure S12.** Visualization of electron localization function (ELF) distribution in the area of bifurcated intermolecular interactions Se $\cdots$ O in the X-ray structure **7**.

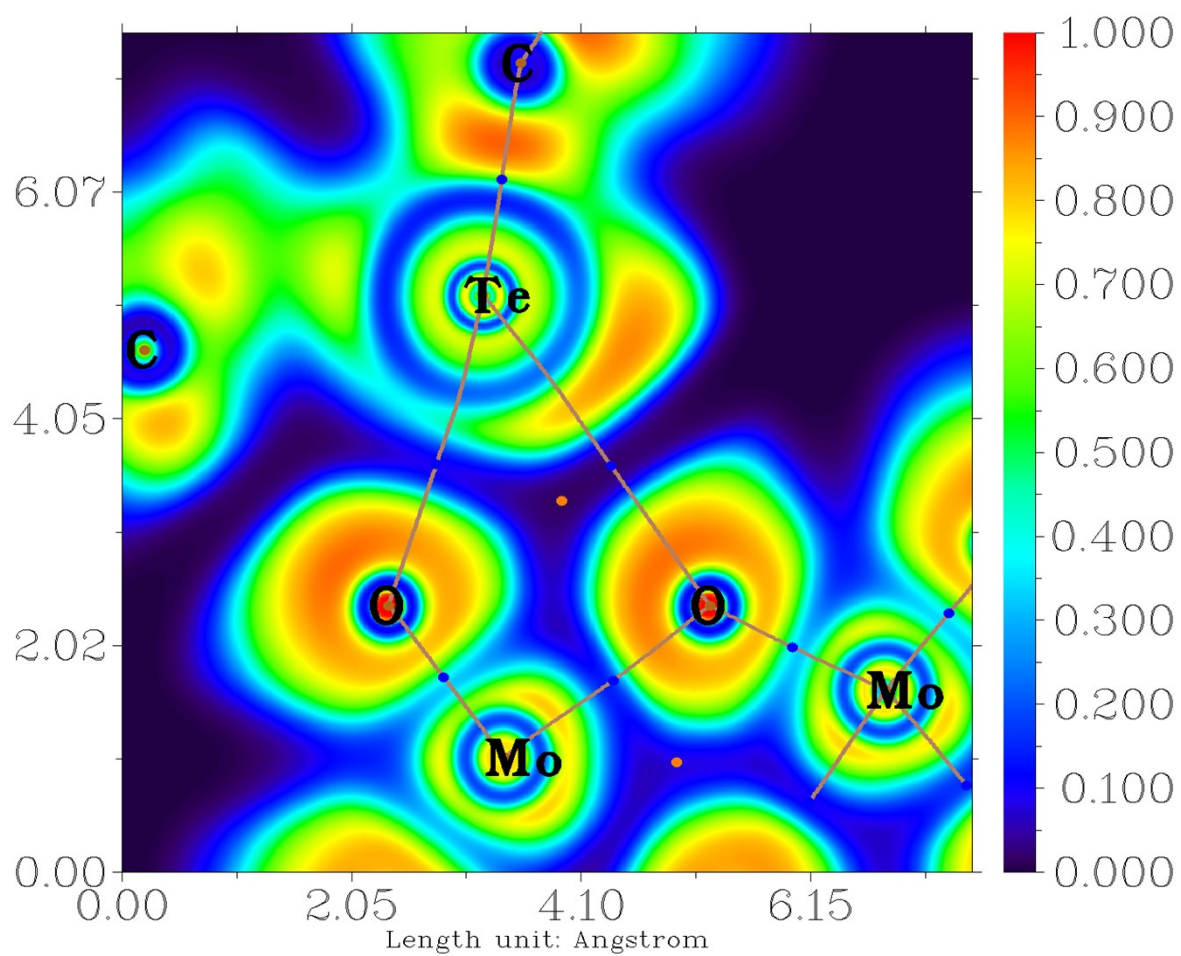

**Figure S13.** Visualization of electron localization function (ELF) distribution in the area of bifurcated intermolecular interactions Te $\cdots$ O in the X-ray structure **8**.

## Computational details

The single point calculations based on the experimental X-ray geometries of structures **1**–**[9]**·**2CH<sub>3</sub>OH** were carried out at the DFT level of theory using the dispersion-corrected hybrid functional  $\omega$ B97XD<sup>11</sup> with the help of Gaussian-09<sup>12</sup> program package (X-ray structures **3** and **4** were not used for computational studies because they did not featuring any interesting noncovalent interactions involving chalcogen atoms, also X-ray structure **4** has disordering in the cationic moiety). The Douglas–Kroll–Hess 2<sup>nd</sup> order scalar relativistic calculations requested relativistic core Hamiltonian were carried out using the DZP-DKH basis sets<sup>13–16</sup> for all atoms. The topological analysis of the electron density distribution with the help of the atoms in molecules (QTAIM) method developed by Bader<sup>17</sup> has been performed by using the Multiwfn program (version 3.7)<sup>18</sup>.

Note that electrostatic, charge-transfer and dispersion terms have been identified as significantly contributing to such type of noncovalent interactions<sup>19,20</sup>, especially when using heavier chalcogens as  $\sigma$ -hole donors.<sup>21</sup> Indeed, results of cation-cluster intermolecular interaction energies analysis performed in CrystalExplorer program [<https://crystalexplorer.net/>] based on the X-ray structure of **8** reveal following electrostatic, dispersion, polarization and exchange-repulsion terms: 1.019, 0.651, 0.901, and 0.811 (CE-HF model) or 1.057, 0.740, 0.871, and 0.618 kJ/mol, respectively (CE-B3LYP model).

The Cartesian atomic coordinates for model supramolecular associates are presented in **Table S1**, Supporting Information.

**Table S3.** Values of the density of all electrons –  $\rho(\mathbf{r})$ , Laplacian of electron density –  $\nabla^2\rho(\mathbf{r})$  and appropriate  $\lambda_2$  eigenvalues, energy density –  $H_b$ , potential energy density –  $V(\mathbf{r})$ , Lagrangian kinetic energy –  $G(\mathbf{r})$ , and electron localization function – ELF (a.u.) at the bond critical points (3, –1), corresponding to intermolecular interactions  $\text{Ch}\cdots\text{O}$  (Ch = S, Se, Te) in the obtained X-ray structures **1**, **2**, **5**–**[9]**·**2CH<sub>3</sub>OH**, and estimated strength for these interactions  $E_{\text{int}}$  (kcal/mol).

| Contact*                     | $\rho(\mathbf{r})$ | $\nabla^2\rho(\mathbf{r})$ | $\lambda_2$ | $H_b$ | $V(\mathbf{r})$ | $G(\mathbf{r})$ | ELF   | $E_{\text{int}}^{**}$ |
|------------------------------|--------------------|----------------------------|-------------|-------|-----------------|-----------------|-------|-----------------------|
| <b>6</b>                     |                    |                            |             |       |                 |                 |       |                       |
| S $\cdots$ O 2.755 Å         | 0.020              | 0.071                      | -0.020      | 0.002 | -0.013          | 0.015           | 0.071 | 4.1                   |
| S $\cdots$ O 2.765 Å         | 0.020              | 0.069                      | -0.020      | 0.002 | -0.013          | 0.015           | 0.072 | 4.1                   |
| <b>7</b>                     |                    |                            |             |       |                 |                 |       |                       |
| Se $\cdots$ O 2.755 Å        | 0.021              | 0.075                      | -0.021      | 0.003 | -0.014          | 0.017           | 0.071 | 4.4                   |
| Se $\cdots$ O 2.935 Å        | 0.015              | 0.054                      | -0.015      | 0.002 | -0.009          | 0.011           | 0.055 | 2.8                   |
| Se $\cdots$ O 3.118 Å        | 0.011              | 0.036                      | -0.011      | 0.001 | -0.006          | 0.007           | 0.037 | 1.9                   |
| Se $\cdots$ O 3.306 Å        | 0.008              | 0.025                      | -0.008      | 0.001 | -0.004          | 0.005           | 0.030 | 1.3                   |
| <b>2</b>                     |                    |                            |             |       |                 |                 |       |                       |
| S $\cdots$ O 2.901 Å         | 0.015              | 0.053                      | -0.015      | 0.002 | -0.009          | 0.011           | 0.048 | 2.8                   |
| S $\cdots$ O 3.296 Å         | 0.007              | 0.024                      | -0.007      | 0.001 | -0.004          | 0.005           | 0.027 | 1.3                   |
| S $\cdots$ O 3.336 Å         | 0.007              | 0.026                      | -0.007      | 0.001 | -0.004          | 0.005           | 0.022 | 1.3                   |
| S $\cdots$ O 3.565 Å         | 0.005              | 0.014                      | -0.005      | 0.001 | -0.002          | 0.003           | 0.016 | 0.6                   |
| S $\cdots$ O 3.699 Å         | 0.003              | 0.011                      | -0.003      | 0.000 | -0.002          | 0.002           | 0.010 | 0.6                   |
| <b>5</b>                     |                    |                            |             |       |                 |                 |       |                       |
| S $\cdots$ O 2.747 Å         | 0.021              | 0.072                      | -0.021      | 0.003 | -0.013          | 0.016           | 0.075 | 4.1                   |
| S $\cdots$ O 2.766 Å         | 0.020              | 0.070                      | -0.020      | 0.002 | -0.013          | 0.015           | 0.070 | 4.1                   |
| <b>1</b>                     |                    |                            |             |       |                 |                 |       |                       |
| S $\cdots$ O 2.731 Å         | 0.021              | 0.076                      | -0.021      | 0.002 | -0.014          | 0.016           | 0.069 | 4.4                   |
| S $\cdots$ O 2.875 Å         | 0.017              | 0.060                      | -0.017      | 0.002 | -0.011          | 0.013           | 0.059 | 3.5                   |
| S $\cdots$ O 2.912 Å         | 0.015              | 0.053                      | -0.015      | 0.002 | -0.009          | 0.011           | 0.055 | 2.8                   |
| S $\cdots$ O 2.935 Å         | 0.014              | 0.050                      | -0.014      | 0.002 | -0.008          | 0.010           | 0.049 | 2.5                   |
| S $\cdots$ O 3.102 Å         | 0.011              | 0.042                      | -0.011      | 0.002 | -0.007          | 0.009           | 0.032 | 2.2                   |
| S $\cdots$ O 2.757 Å         | 0.019              | 0.071                      | -0.019      | 0.002 | -0.013          | 0.015           | 0.065 | 4.1                   |
| S $\cdots$ O 2.801 Å         | 0.019              | 0.069                      | -0.019      | 0.003 | -0.012          | 0.015           | 0.065 | 3.8                   |
| S $\cdots$ O 2.856 Å         | 0.017              | 0.060                      | -0.017      | 0.003 | -0.010          | 0.013           | 0.060 | 3.1                   |
| S $\cdots$ O 2.964 Å         | 0.013              | 0.048                      | -0.013      | 0.002 | -0.008          | 0.010           | 0.046 | 2.5                   |
| <b>8</b>                     |                    |                            |             |       |                 |                 |       |                       |
| Te $\cdots$ O 2.743 Å        | 0.027              | 0.073                      | -0.027      | 0.000 | -0.020          | 0.020           | 0.119 | 6.3                   |
| Te $\cdots$ O 2.925 Å        | 0.020              | 0.063                      | -0.020      | 0.000 | -0.015          | 0.015           | 0.077 | 4.7                   |
| Te $\cdots$ O 3.000 Å        | 0.017              | 0.053                      | -0.017      | 0.000 | -0.012          | 0.012           | 0.064 | 3.8                   |
| Te $\cdots$ O 3.194 Å        | 0.012              | 0.042                      | -0.012      | 0.001 | -0.008          | 0.009           | 0.040 | 2.5                   |
| <b>[9]·2CH<sub>3</sub>OH</b> |                    |                            |             |       |                 |                 |       |                       |
| Te $\cdots$ O 2.900 Å        | 0.021              | 0.056                      | -0.021      | 0.000 | -0.014          | 0.014           | 0.093 | 4.4                   |
| Te $\cdots$ O 2.912 Å        | 0.020              | 0.056                      | -0.020      | 0.001 | -0.013          | 0.014           | 0.085 | 4.1                   |
| Te $\cdots$ O 3.028 Å        | 0.017              | 0.054                      | -0.017      | 0.001 | -0.012          | 0.013           | 0.063 | 3.8                   |
| Te $\cdots$ O 3.070 Å        | 0.015              | 0.048                      | -0.015      | 0.001 | -0.010          | 0.011           | 0.052 | 3.1                   |
| Te $\cdots$ O 3.241 Å        | 0.011              | 0.038                      | -0.011      | 0.001 | -0.007          | 0.008           | 0.034 | 2.2                   |
| Te $\cdots$ O 3.435 Å        | 0.008              | 0.028                      | -0.008      | 0.001 | -0.005          | 0.006           | 0.021 | 1.6                   |

\* The Bondi's (shortest) van der Waals radii for O, S, Se, and Te atoms are 1.52, 1.80, 1.90, and 2.00 Å, respectively.<sup>22</sup> \*\*  $E_{\text{int}} \approx -V(\mathbf{r})/2$ .<sup>23</sup>

**Table S4.** Values of the density of all electrons –  $\rho(\mathbf{r})$ , Laplacian of electron density –  $\nabla^2\rho(\mathbf{r})$  and appropriate  $\lambda_2$  eigenvalues, energy density –  $H_b$ , potential energy density –  $V(\mathbf{r})$ , Lagrangian kinetic energy –  $G(\mathbf{r})$ , and electron localization function – ELF (a.u.) at the bond critical points (3, –1), corresponding to intermolecular interactions C $\cdots$ C in the obtained X-ray structures **1–5** and **[9]·2CH<sub>3</sub>OH**, and estimated strength for these interactions  $E_{\text{int}}$  (kcal/mol).

| Contact*                        | $\rho(\mathbf{r})$ | $\nabla^2\rho(\mathbf{r})$ | $\lambda_2$ | $H_b$ | $V(\mathbf{r})$ | $G(\mathbf{r})$ | ELF   | $E_{\text{int}}$ ** |
|---------------------------------|--------------------|----------------------------|-------------|-------|-----------------|-----------------|-------|---------------------|
| <b>2</b>                        |                    |                            |             |       |                 |                 |       |                     |
| C $\cdots$ C 3.334 Å            | 0.007              | 0.021                      | -0.007      | 0.001 | -0.003          | 0.004           | 0.026 | 0.9                 |
| <b>4 dimer1</b>                 |                    |                            |             |       |                 |                 |       |                     |
| C $\cdots$ C 3.283 Å            | 0.007              | 0.019                      | -0.007      | 0.001 | -0.003          | 0.004           | 0.030 | 0.9                 |
| C $\cdots$ C 3.473 Å            | 0.005              | 0.016                      | -0.005      | 0.001 | -0.002          | 0.003           | 0.022 | 0.6                 |
| C $\cdots$ C 3.460 Å            | 0.005              | 0.015                      | -0.005      | 0.001 | -0.002          | 0.003           | 0.019 | 0.6                 |
| C $\cdots$ C 3.789 Å            | 0.003              | 0.009                      | -0.003      | 0.001 | -0.001          | 0.002           | 0.013 | 0.3                 |
| C $\cdots$ C 3.531 Å            | 0.004              | 0.013                      | -0.004      | 0.000 | -0.002          | 0.002           | 0.021 | 0.6                 |
| <b>3_pp</b>                     |                    |                            |             |       |                 |                 |       |                     |
| C $\cdots$ C 3.397 Å            | 0.006              | 0.017                      | -0.006      | 0.001 | -0.002          | 0.003           | 0.024 | 0.6                 |
| C $\cdots$ C 3.441 Å            | 0.006              | 0.018                      | -0.006      | 0.001 | -0.002          | 0.003           | 0.025 | 0.6                 |
| C $\cdots$ C 3.397 Å            | 0.006              | 0.017                      | -0.006      | 0.001 | -0.002          | 0.003           | 0.024 | 0.6                 |
| C $\cdots$ C 3.441 Å            | 0.006              | 0.018                      | -0.006      | 0.001 | -0.002          | 0.003           | 0.025 | 0.6                 |
| <b>5</b>                        |                    |                            |             |       |                 |                 |       |                     |
| C $\cdots$ C 3.554 Å            | 0.005              | 0.013                      | -0.005      | 0.001 | -0.002          | 0.003           | 0.020 | 0.6                 |
| C $\cdots$ C 3.418 Å            | 0.005              | 0.016                      | -0.005      | 0.001 | -0.002          | 0.003           | 0.021 | 0.6                 |
| C $\cdots$ C 3.554 Å            | 0.005              | 0.013                      | -0.005      | 0.001 | -0.002          | 0.003           | 0.020 | 0.6                 |
| C $\cdots$ C 3.418 Å            | 0.005              | 0.016                      | -0.005      | 0.001 | -0.002          | 0.003           | 0.021 | 0.6                 |
| <b>1_pp</b>                     |                    |                            |             |       |                 |                 |       |                     |
| C $\cdots$ C 3.574 Å            | 0.004              | 0.012                      | -0.004      | 0.001 | -0.001          | 0.002           | 0.019 | 0.3                 |
| C $\cdots$ C 3.603 Å            | 0.004              | 0.013                      | -0.004      | 0.000 | -0.002          | 0.002           | 0.019 | 0.6                 |
| C $\cdots$ C 3.621 Å            | 0.004              | 0.011                      | -0.004      | 0.001 | -0.001          | 0.002           | 0.013 | 0.3                 |
| C $\cdots$ C 3.290 Å            | 0.007              | 0.021                      | -0.007      | 0.001 | -0.003          | 0.004           | 0.026 | 0.9                 |
| C $\cdots$ C 3.414 Å            | 0.006              | 0.020                      | -0.006      | 0.002 | -0.002          | 0.004           | 0.025 | 0.6                 |
| C $\cdots$ C 3.414 Å            | 0.006              | 0.020                      | -0.006      | 0.002 | -0.002          | 0.004           | 0.025 | 0.6                 |
| <b>[9]·2CH<sub>3</sub>OH_pp</b> |                    |                            |             |       |                 |                 |       |                     |
| C $\cdots$ C 3.432 Å            | 0.005              | 0.017                      | -0.005      | 0.001 | -0.002          | 0.003           | 0.021 | 0.6                 |
| C $\cdots$ C 3.370 Å            | 0.006              | 0.018                      | -0.006      | 0.001 | -0.002          | 0.003           | 0.026 | 0.6                 |
| C $\cdots$ C 3.477 Å            | 0.005              | 0.016                      | -0.005      | 0.001 | -0.002          | 0.003           | 0.019 | 0.6                 |
| C $\cdots$ C 3.686 Å            | 0.003              | 0.010                      | -0.003      | 0.001 | -0.001          | 0.002           | 0.013 | 0.3                 |
| C $\cdots$ C 3.596 Å            | 0.005              | 0.013                      | -0.005      | 0.000 | -0.002          | 0.002           | 0.022 | 0.6                 |
| C $\cdots$ C 3.596 Å            | 0.005              | 0.013                      | -0.005      | 0.000 | -0.002          | 0.002           | 0.022 | 0.6                 |

\* The Bondi's (shortest) van der Waals radii for O, S, Se, and Te atoms are 1.52, 1.80, 1.90, and 2.00 Å, respectively.<sup>22</sup> \*\*  $E_{\text{int}} \approx -V(\mathbf{r})/2$ .<sup>23</sup>

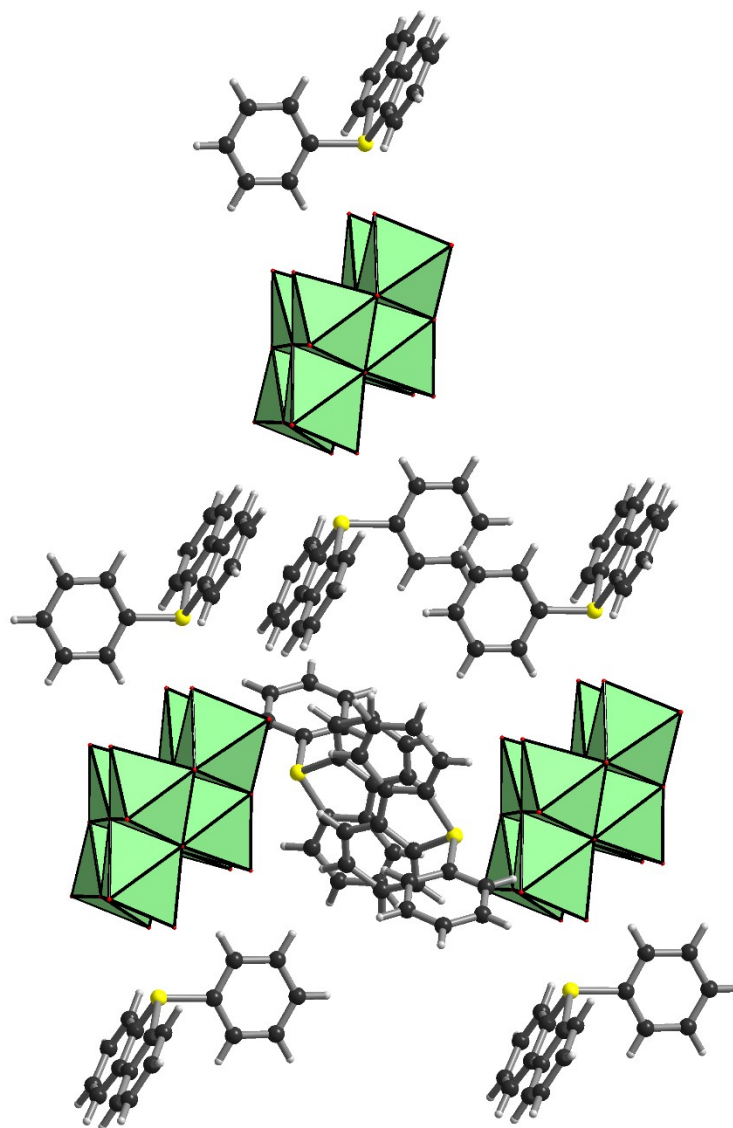

**Figure S12.** Model for calculations from the crystal structure of **1**.

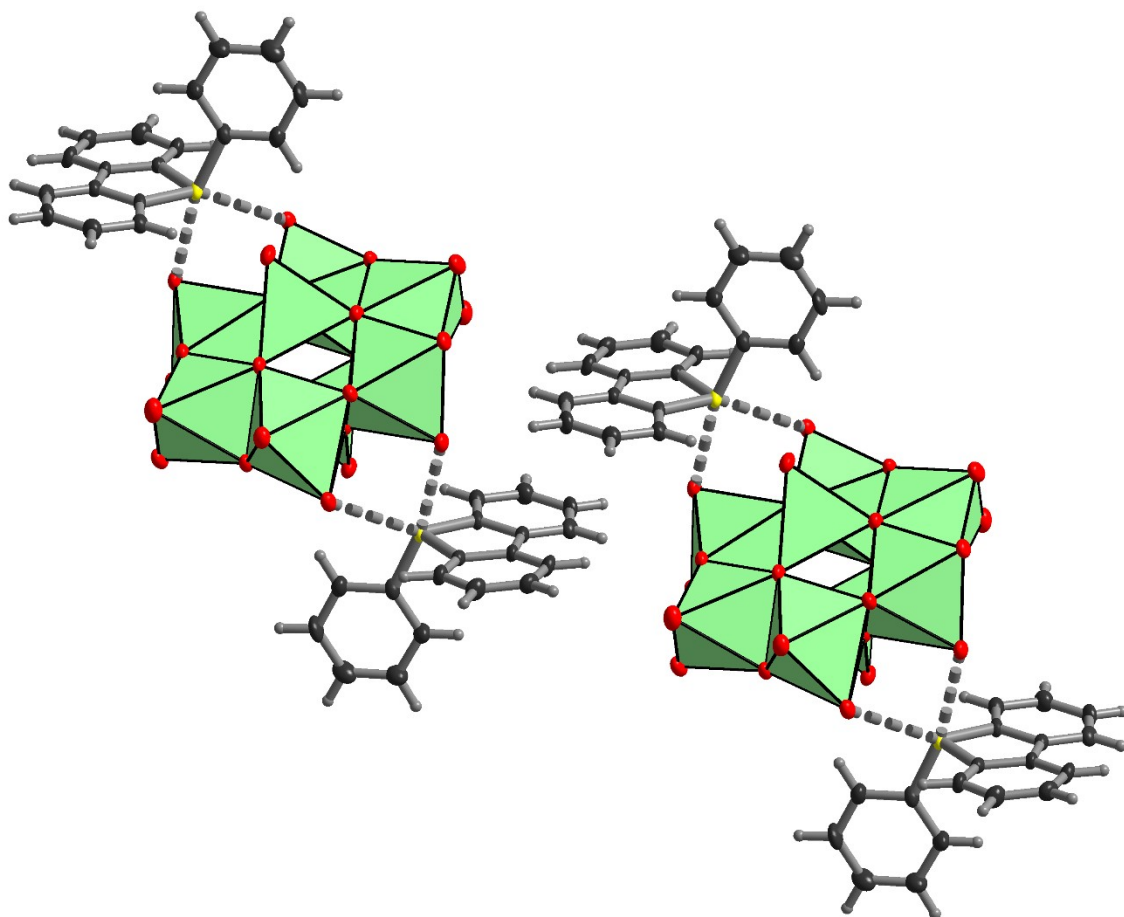

**Figure S13.** Model for calculations from the crystal structure of **2**.

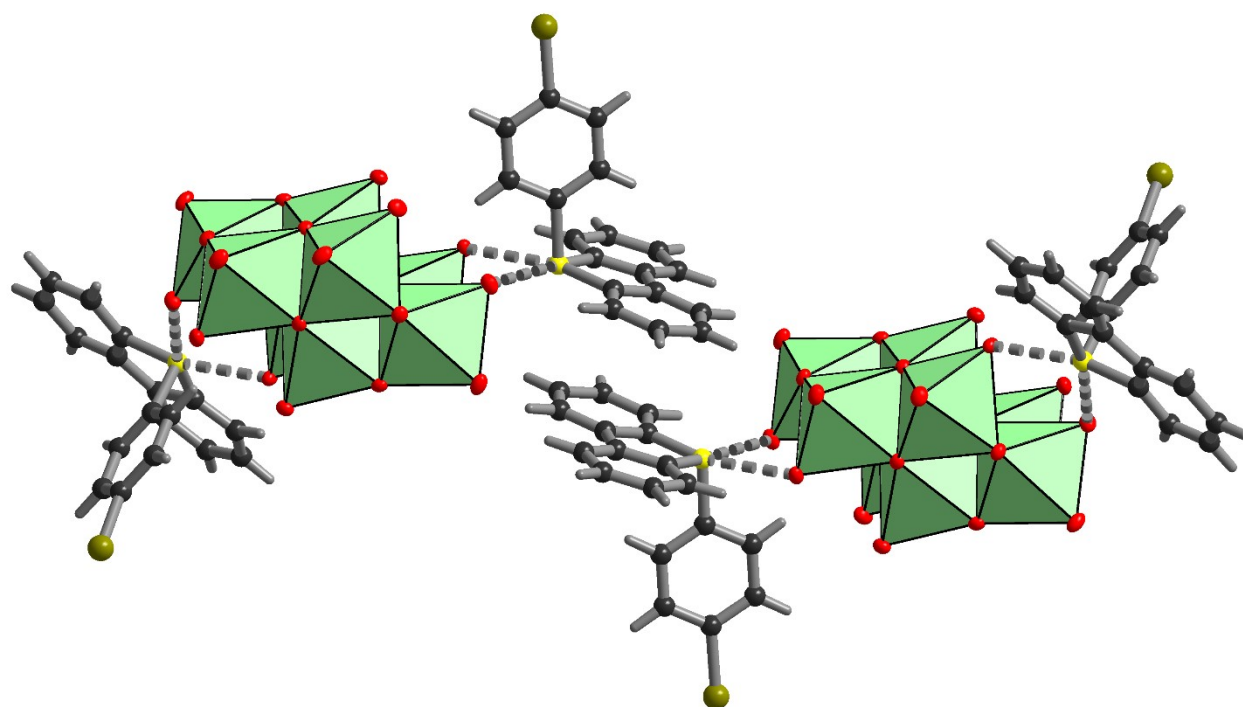

**Figure S14.** Model for calculations from the crystal structure of **5**.



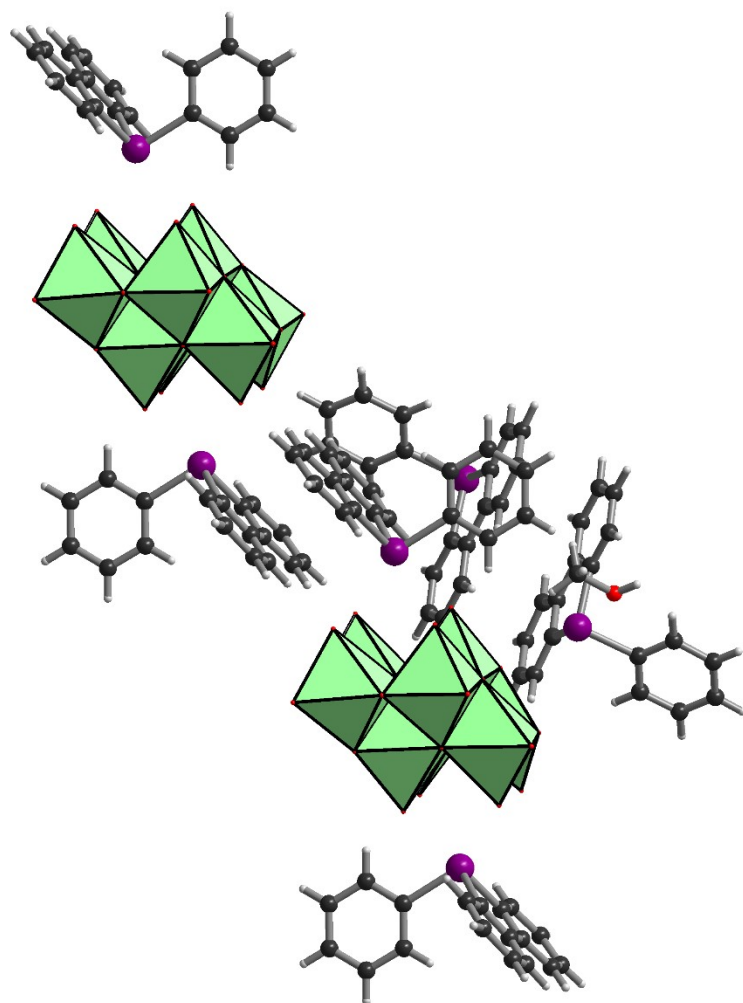

**Figure S15.** Model for calculations from the crystal structure of **9**.

**Table S5.** Cartesian atomic coordinates for model supramolecular associates.

| Atom     | X        | Y         | Z         |
|----------|----------|-----------|-----------|
| <b>6</b> |          |           |           |
| S        | 5.979924 | 10.708823 | 16.533257 |
| F        | 0.965668 | 13.664410 | 16.978390 |
| C        | 4.752948 | 8.311519  | 17.328139 |
| H        | 4.676529 | 8.642877  | 18.215256 |
| C        | 4.287759 | 7.068781  | 16.983882 |
| H        | 3.858181 | 6.535753  | 17.642045 |
| C        | 4.428920 | 6.574727  | 15.692127 |
| H        | 4.106672 | 5.704905  | 15.483116 |
| C        | 5.036874 | 7.338611  | 14.706184 |
| H        | 5.138895 | 6.994559  | 13.826582 |
| C        | 5.492438 | 8.611752  | 15.021536 |
| C        | 5.343257 | 9.064002  | 16.323119 |
| C        | 6.143703 | 9.603661  | 14.152657 |
| C        | 6.509438 | 9.482048  | 12.813787 |
| H        | 6.299108 | 8.693119  | 12.327724 |
| C        | 7.187972 | 10.532864 | 12.196091 |
| H        | 7.432260 | 10.456837 | 11.281370 |
| C        | 7.512000 | 11.695793 | 12.898767 |
| H        | 7.978056 | 12.399041 | 12.462767 |
| C        | 7.155890 | 11.821206 | 14.237926 |
| H        | 7.389255 | 12.597252 | 14.734569 |
| C        | 6.454898 | 10.793193 | 14.821514 |
| C        | 4.448169 | 11.652088 | 16.624307 |
| C        | 3.432774 | 11.361356 | 15.755717 |
| H        | 3.544387 | 10.705935 | 15.078160 |
| C        | 2.228095 | 12.051132 | 15.888969 |
| H        | 1.500860 | 11.877301 | 15.302519 |

|    |          |           |           |
|----|----------|-----------|-----------|
| C  | 2.120620 | 12.995536 | 16.889075 |
| C  | 3.118370 | 13.267266 | 17.753328 |
| H  | 2.997758 | 13.915181 | 18.439412 |
| C  | 4.327862 | 12.590791 | 17.632217 |
| H  | 5.049290 | 12.767872 | 18.223754 |
| Mo | 8.721171 | 13.017579 | 18.131403 |
| Mo | 7.446874 | 15.320253 | 20.059353 |
| Mo | 6.260000 | 13.005607 | 21.928627 |
| Mo | 7.489062 | 10.663218 | 20.082477 |
| O  | 9.940608 | 12.986795 | 16.950353 |
| O  | 8.697109 | 14.842350 | 18.712968 |
| O  | 7.274594 | 13.038671 | 17.231597 |
| O  | 8.663744 | 11.165444 | 18.684063 |
| O  | 5.974791 | 10.693052 | 19.298579 |
| O  | 7.866506 | 9.014976  | 20.216306 |
| O  | 6.768981 | 11.108248 | 21.892206 |
| O  | 4.823047 | 12.988125 | 21.045585 |
| O  | 5.748613 | 12.995346 | 23.604238 |
| O  | 6.745401 | 14.895746 | 21.872262 |
| O  | 7.651076 | 13.005607 | 20.334527 |
| O  | 5.979604 | 15.251085 | 19.215333 |
| O  | 7.786783 | 16.978566 | 20.227290 |
| Mo | 7.319829 | 13.017579 | 25.225797 |
| Mo | 8.594126 | 15.320253 | 23.297847 |
| Mo | 9.781000 | 13.005607 | 21.428573 |
| Mo | 8.551938 | 10.663218 | 23.274723 |
| O  | 6.100392 | 12.986795 | 26.406847 |
| O  | 7.343891 | 14.842350 | 24.644232 |
| O  | 8.766407 | 13.038671 | 26.125603 |
| O  | 7.377256 | 11.165444 | 24.673137 |

|    |           |           |           |
|----|-----------|-----------|-----------|
| O  | 10.066209 | 10.693052 | 24.058621 |
| O  | 8.174494  | 9.014976  | 23.140894 |
| O  | 9.272019  | 11.108248 | 21.464994 |
| O  | 11.217953 | 12.988125 | 22.311615 |
| O  | 10.292387 | 12.995346 | 19.752962 |
| O  | 9.295599  | 14.895746 | 21.484938 |
| O  | 8.389924  | 13.005607 | 23.022673 |
| O  | 10.061396 | 15.251085 | 24.141867 |
| O  | 8.254217  | 16.978566 | 23.129910 |
| 7  |           |           |           |
| Mo | 11.503700 | 7.297445  | 11.261057 |
| Mo | 9.174459  | 8.330840  | 9.218982  |
| Mo | 10.783156 | 6.971329  | 6.714767  |
| Mo | 13.038271 | 5.966614  | 8.771446  |
| O  | 10.737129 | 5.797619  | 11.405714 |
| O  | 11.905121 | 7.734271  | 12.860986 |
| O  | 8.378595  | 6.844583  | 9.472307  |
| O  | 10.043139 | 8.460515  | 10.924101 |
| O  | 7.951662  | 9.525982  | 9.310610  |
| O  | 9.462089  | 8.173718  | 7.335474  |
| O  | 11.402644 | 7.327204  | 8.926362  |
| O  | 10.663478 | 7.200766  | 5.028251  |
| O  | 12.654819 | 6.312620  | 6.890373  |
| O  | 10.031094 | 5.452229  | 6.980784  |
| O  | 13.248191 | 6.621004  | 10.598969 |
| O  | 12.179763 | 4.531703  | 9.028944  |
| O  | 14.704596 | 5.475358  | 8.545592  |
| Mo | 13.931938 | 8.121755  | 6.125703  |
| Mo | 16.261180 | 7.088360  | 8.167778  |
| Mo | 14.652482 | 8.447871  | 10.671993 |

|    |           |           |           |
|----|-----------|-----------|-----------|
| Mo | 12.397367 | 9.452586  | 8.615313  |
| O  | 14.698509 | 9.621581  | 5.981045  |
| O  | 13.530517 | 7.684929  | 4.525774  |
| O  | 17.057043 | 8.574617  | 7.914453  |
| O  | 15.392500 | 6.958685  | 6.462659  |
| O  | 17.483976 | 5.893218  | 8.076150  |
| O  | 15.973549 | 7.245482  | 10.051286 |
| O  | 14.032994 | 8.091996  | 8.460397  |
| O  | 14.772160 | 8.218434  | 12.358509 |
| O  | 12.780819 | 9.106580  | 10.496387 |
| O  | 15.404545 | 9.966971  | 10.405976 |
| O  | 12.187447 | 8.798196  | 6.787791  |
| O  | 13.255875 | 10.887497 | 8.357815  |
| O  | 10.731042 | 9.943842  | 8.841167  |
| Se | 9.106390  | 4.020094  | 9.144566  |
| C  | 7.510129  | 3.905683  | 8.076150  |
| C  | 6.399405  | 4.709024  | 8.203073  |
| H  | 6.369925  | 5.407128  | 8.845462  |
| C  | 5.328004  | 4.465400  | 7.363293  |
| H  | 4.541658  | 4.993832  | 7.439290  |
| C  | 5.389740  | 3.456985  | 6.413976  |
| H  | 4.643552  | 3.314110  | 5.843151  |
| C  | 6.506279  | 2.655186  | 6.271404  |
| H  | 6.542538  | 1.974783  | 5.609264  |
| C  | 7.591256  | 2.881848  | 7.144220  |
| C  | 8.829643  | 2.084676  | 7.206812  |
| C  | 9.165173  | 1.008416  | 6.382679  |
| H  | 8.611969  | 0.771515  | 5.648680  |
| C  | 10.307351 | 0.300674  | 6.652174  |
| H  | 10.529639 | -0.443795 | 6.106300  |

|          |           |          |           |
|----------|-----------|----------|-----------|
| C        | 11.143056 | 0.644523 | 7.700596  |
| H        | 11.925968 | 0.130847 | 7.863127  |
| C        | 10.850790 | 1.734660 | 8.521251  |
| H        | 11.421762 | 1.980319 | 9.239880  |
| C        | 9.693905  | 2.445485 | 8.244801  |
| C        | 8.350348  | 3.262703 | 10.750234 |
| C        | 8.084663  | 4.214067 | 11.770836 |
| H        | 8.327120  | 5.126822 | 11.660969 |
| C        | 7.466832  | 3.780788 | 12.923578 |
| H        | 7.291935  | 4.398188 | 13.622978 |
| C        | 7.099326  | 2.459362 | 13.073105 |
| H        | 6.660521  | 2.166444 | 13.862585 |
| C        | 7.386339  | 1.548088 | 12.029899 |
| H        | 7.179676  | 0.627654 | 12.137627 |
| C        | 7.957733  | 1.982909 | 10.870202 |
| H        | 8.078055  | 1.380404 | 10.145592 |
| <b>2</b> |           |          |           |
| Mo       | 8.851810  | 4.450685 | 12.398326 |
| Mo       | 8.629871  | 8.120581 | 11.426270 |
| Mo       | 6.280272  | 6.118857 | 10.188365 |
| Mo       | 5.268019  | 3.380520 | 11.900154 |
| O        | 10.029260 | 3.536469 | 11.571207 |
| O        | 9.520890  | 5.137802 | 13.882545 |
| O        | 8.340320  | 5.800721 | 11.342846 |
| O        | 10.061281 | 7.616686 | 12.594215 |
| O        | 9.484293  | 8.046814 | 9.944955  |
| O        | 8.466634  | 9.781424 | 11.736209 |
| O        | 6.804668  | 7.811940 | 10.911202 |
| O        | 7.064181  | 6.149067 | 8.683026  |
| O        | 4.654214  | 6.430714 | 9.828794  |

|    |           |          |           |
|----|-----------|----------|-----------|
| O  | 6.253625  | 4.233476 | 10.512559 |
| O  | 7.467342  | 3.418085 | 12.847657 |
| O  | 5.399403  | 1.751198 | 11.477487 |
| O  | 3.674994  | 3.814108 | 11.485407 |
| Mo | 6.302740  | 6.525667 | 14.001874 |
| Mo | 6.524679  | 2.855770 | 14.973929 |
| Mo | 8.874278  | 4.857494 | 16.211834 |
| Mo | 9.886530  | 7.595832 | 14.500045 |
| O  | 5.125290  | 7.439882 | 14.828992 |
| O  | 5.633660  | 5.838549 | 12.517655 |
| O  | 6.814230  | 5.175631 | 15.057354 |
| O  | 5.093269  | 3.359666 | 13.805984 |
| O  | 5.670257  | 2.929538 | 16.455244 |
| O  | 6.687915  | 1.194928 | 14.663991 |
| O  | 8.349882  | 3.164412 | 15.488997 |
| O  | 8.090368  | 4.827285 | 17.717174 |
| O  | 10.500336 | 4.545638 | 16.571405 |
| O  | 8.900925  | 6.742876 | 15.887640 |
| O  | 7.687208  | 7.558267 | 13.552542 |
| O  | 9.755146  | 9.225153 | 14.922713 |
| O  | 11.479555 | 7.162244 | 14.914793 |
| S  | 9.772898  | 5.148836 | 8.401995  |
| C  | 9.168918  | 3.592183 | 7.772219  |
| C  | 9.131384  | 2.418803 | 8.483704  |
| H  | 9.415757  | 2.381321 | 9.389772  |
| C  | 8.660214  | 1.289739 | 7.827659  |
| H  | 8.623816  | 0.456349 | 8.283208  |
| C  | 8.244887  | 1.375583 | 6.508969  |
| H  | 7.926770  | 0.592693 | 6.076375  |
| C  | 8.276448  | 2.561144 | 5.802764  |

|   |           |           |           |
|---|-----------|-----------|-----------|
| H | 7.986559  | 2.593590  | 4.899085  |
| C | 8.743336  | 3.718422  | 6.445609  |
| C | 8.830806  | 5.073630  | 5.949285  |
| C | 9.455938  | 5.951669  | 6.848212  |
| C | 9.649439  | 7.285186  | 6.578930  |
| H | 10.054248 | 7.859007  | 7.217722  |
| C | 9.237616  | 7.765898  | 5.351320  |
| H | 9.413103  | 8.670355  | 5.121401  |
| C | 8.568090  | 6.943235  | 4.444474  |
| H | 8.241718  | 7.308398  | 3.630674  |
| C | 8.372221  | 5.583450  | 4.725636  |
| H | 7.937552  | 5.018204  | 4.097918  |
| C | 11.547167 | 4.957220  | 8.416384  |
| C | 12.242801 | 4.486377  | 7.304935  |
| H | 11.792488 | 4.269797  | 6.498171  |
| C | 13.626760 | 4.346187  | 7.421096  |
| H | 14.136052 | 4.024374  | 6.686405  |
| C | 14.255938 | 4.675903  | 8.610425  |
| H | 15.196452 | 4.564526  | 8.682432  |
| C | 13.563342 | 5.153900  | 9.673033  |
| H | 14.024319 | 5.391134  | 10.468946 |
| C | 12.190553 | 5.297470  | 9.607033  |
| H | 11.697248 | 5.620333  | 10.352297 |
| S | 4.040100  | 9.694675  | 9.330490  |
| C | 2.591582  | 9.975967  | 8.337183  |
| C | 2.602949  | 10.550309 | 7.076573  |
| H | 3.406511  | 10.861520 | 6.677534  |
| C | 1.387016  | 10.645329 | 6.428449  |
| H | 1.345755  | 11.037815 | 5.564687  |
| C | 0.204377  | 10.168806 | 7.035653  |



|          |           |           |           |
|----------|-----------|-----------|-----------|
| H        | -0.624506 | 10.259732 | 6.581596  |
| C        | 0.235471  | 9.573900  | 8.273822  |
| H        | -0.558973 | 9.231645  | 8.666169  |
| C        | 1.447244  | 9.482119  | 8.941748  |
| C        | 1.719050  | 8.932766  | 10.289478 |
| C        | 0.827806  | 8.346959  | 11.171244 |
| H        | -0.095467 | 8.287931  | 10.955053 |
| C        | 1.307068  | 7.844532  | 12.385654 |
| H        | 0.707264  | 7.432413  | 12.996237 |
| C        | 2.645860  | 7.941997  | 12.701136 |
| H        | 2.943212  | 7.606012  | 13.538431 |
| C        | 3.575831  | 8.513265  | 11.844449 |
| H        | 4.499713  | 8.561964  | 12.058911 |
| C        | 3.056734  | 9.013143  | 10.641920 |
| C        | 5.921923  | 11.473818 | 10.099396 |
| H        | 6.510735  | 10.728622 | 10.065406 |
| C        | 4.552770  | 11.331804 | 9.820874  |
| C        | 3.691376  | 12.388999 | 9.898755  |
| H        | 2.766342  | 12.273100 | 9.716580  |
| C        | 4.191645  | 13.641485 | 10.251197 |
| H        | 3.607883  | 14.389677 | 10.305635 |
| C        | 5.537107  | 13.792688 | 10.521799 |
| H        | 5.872184  | 14.643575 | 10.777842 |
| C        | 6.385462  | 12.743337 | 10.426759 |
| H        | 7.312211  | 12.875146 | 10.585833 |
| <b>5</b> |           |           |           |
| C        | 6.451715  | 10.828039 | 14.730662 |
| C        | 7.128638  | 11.864889 | 14.110064 |
| H        | 7.353231  | 12.663843 | 14.571507 |
| C        | 7.457428  | 11.671807 | 12.777257 |

|    |          |           |           |
|----|----------|-----------|-----------|
| H  | 7.918622 | 12.356302 | 12.307687 |
| C  | 7.130249 | 10.501730 | 12.118177 |
| H  | 7.358533 | 10.404938 | 11.200863 |
| C  | 6.475891 | 9.464880  | 12.768067 |
| H  | 6.263611 | 8.662624  | 12.307343 |
| C  | 6.135818 | 9.627069  | 14.115233 |
| C  | 5.523364 | 8.642350  | 15.026171 |
| C  | 5.109152 | 7.344839  | 14.766273 |
| H  | 5.209015 | 6.968735  | 13.899302 |
| C  | 4.549886 | 6.607266  | 15.794668 |
| H  | 4.241999 | 5.724881  | 15.623479 |
| C  | 4.430618 | 7.138242  | 17.076069 |
| H  | 4.031057 | 6.614256  | 17.760853 |
| C  | 4.877065 | 8.400998  | 17.370143 |
| H  | 4.827472 | 8.753546  | 18.251272 |
| C  | 5.400874 | 9.134709  | 16.332845 |
| C  | 4.445124 | 11.708492 | 16.524108 |
| C  | 3.432964 | 11.376391 | 15.647057 |
| H  | 3.576084 | 10.723929 | 14.972124 |
| C  | 2.206445 | 12.009700 | 15.764801 |
| H  | 1.494725 | 11.801616 | 15.171485 |
| C  | 2.040438 | 12.944217 | 16.754714 |
| C  | 3.059045 | 13.293696 | 17.632339 |
| H  | 2.915456 | 13.949344 | 18.304142 |
| C  | 4.287175 | 12.666179 | 17.510574 |
| H  | 5.005519 | 12.888185 | 18.091053 |
| S  | 6.005269 | 10.807379 | 16.462364 |
| Br | 0.345392 | 13.770994 | 16.958325 |
| O  | 9.860664 | 13.179198 | 16.766201 |
| O  | 8.665413 | 15.026607 | 18.557636 |

|    |           |           |           |
|----|-----------|-----------|-----------|
| O  | 7.800241  | 17.166341 | 20.083429 |
| O  | 6.793561  | 15.084724 | 21.758268 |
| O  | 5.832976  | 13.182287 | 23.507201 |
| O  | 4.849988  | 13.169737 | 20.967659 |
| O  | 6.808066  | 11.288539 | 21.771766 |
| O  | 5.964492  | 10.866848 | 19.208388 |
| O  | 7.870351  | 9.192634  | 20.071367 |
| O  | 7.202616  | 13.215691 | 17.106511 |
| O  | 8.636240  | 11.356504 | 18.535236 |
| O  | 5.957401  | 15.439030 | 19.121373 |
| O  | 7.655831  | 13.190397 | 20.201173 |
| Mo | 8.675244  | 13.206423 | 17.978392 |
| Mo | 7.456461  | 15.515876 | 19.936679 |
| Mo | 6.306822  | 13.194452 | 21.823459 |
| Mo | 7.500139  | 10.849857 | 19.957356 |
| O  | 6.256536  | 13.179198 | 26.310949 |
| O  | 7.451787  | 15.026607 | 24.519514 |
| O  | 8.316959  | 17.166341 | 22.993721 |
| O  | 9.323639  | 15.084724 | 21.318882 |
| O  | 10.284224 | 13.182287 | 19.569949 |
| O  | 11.267212 | 13.169737 | 22.109491 |
| O  | 9.309134  | 11.288539 | 21.305384 |
| O  | 10.152708 | 10.866848 | 23.868762 |
| O  | 8.246849  | 9.192634  | 23.005783 |
| O  | 8.914584  | 13.215691 | 25.970639 |
| O  | 7.480960  | 11.356504 | 24.541914 |
| O  | 10.159799 | 15.439030 | 23.955777 |
| O  | 8.461369  | 13.190397 | 22.875977 |
| Mo | 7.441956  | 13.206423 | 25.098758 |
| Mo | 8.660739  | 15.515876 | 23.140471 |

|                |           |           |           |
|----------------|-----------|-----------|-----------|
| Mo             | 9.810378  | 13.194452 | 21.253691 |
| Mo             | 8.617061  | 10.849857 | 23.119794 |
| <b>1_part1</b> |           |           |           |
| C              | 16.875085 | 14.764581 | -0.474730 |
| C              | 16.592049 | 14.592596 | -1.817261 |
| H              | 16.116568 | 13.830848 | -2.127148 |
| C              | 17.028839 | 15.576621 | -2.696806 |
| H              | 16.840579 | 15.501627 | -3.624779 |
| C              | 17.748364 | 16.679651 | -2.216387 |
| H              | 18.048999 | 17.341270 | -2.828289 |
| C              | 18.028554 | 16.826046 | -0.869819 |
| H              | 18.513818 | 17.581117 | -0.559969 |
| C              | 17.592373 | 15.851878 | 0.028994  |
| C              | 17.796355 | 15.774694 | 1.481445  |
| C              | 18.455412 | 16.662298 | 2.323555  |
| H              | 18.849697 | 17.455434 | 1.979536  |
| C              | 18.525385 | 16.364960 | 3.684437  |
| H              | 18.962917 | 16.973064 | 4.268739  |
| C              | 17.979943 | 15.217511 | 4.201557  |
| H              | 18.030468 | 15.054687 | 5.136301  |
| C              | 17.349855 | 14.284414 | 3.376880  |
| H              | 17.002713 | 13.467594 | 3.717009  |
| C              | 17.259558 | 14.614047 | 2.036001  |
| C              | 14.800796 | 13.595169 | 1.086173  |
| C              | 14.167469 | 14.797377 | 1.371892  |
| H              | 14.655829 | 15.611440 | 1.395124  |
| C              | 12.807693 | 14.778772 | 1.621644  |
| H              | 12.353868 | 15.586752 | 1.830566  |
| C              | 12.106657 | 13.588465 | 1.568611  |
| H              | 11.170143 | 13.587028 | 1.729784  |

|   |           |           |           |
|---|-----------|-----------|-----------|
| C | 12.750239 | 12.410134 | 1.285461  |
| H | 12.257269 | 11.598567 | 1.258669  |
| C | 14.128142 | 12.395799 | 1.035525  |
| H | 14.582489 | 11.585603 | 0.837632  |
| S | 16.570387 | 13.547277 | 0.785957  |
| C | 10.626671 | 6.031816  | 1.894885  |
| C | 10.763373 | 4.970267  | 1.013872  |
| H | 11.534732 | 4.416300  | 1.015780  |
| C | 9.704801  | 4.756741  | 0.119830  |
| H | 9.742900  | 4.032519  | -0.494384 |
| C | 8.598611  | 5.601030  | 0.129555  |
| H | 7.888167  | 5.440541  | -0.480162 |
| C | 8.506822  | 6.665903  | 1.000476  |
| H | 7.745259  | 7.232847  | 0.988199  |
| C | 9.544543  | 6.900269  | 1.898371  |
| C | 9.725923  | 8.029117  | 2.828197  |
| C | 8.886205  | 9.109972  | 3.069507  |
| H | 8.045424  | 9.176078  | 2.633240  |
| C | 9.298551  | 10.093369 | 3.959145  |
| H | 8.724913  | 10.828230 | 4.139844  |
| C | 10.540036 | 10.023327 | 4.593343  |
| H | 10.804877 | 10.718096 | 5.184875  |
| C | 11.393363 | 8.952346  | 4.370750  |
| H | 12.243742 | 8.899072  | 4.790483  |
| C | 10.949106 | 7.966454  | 3.511757  |
| C | 12.723280 | 4.924560  | 5.090277  |
| H | 13.597195 | 5.153055  | 4.793181  |
| C | 11.597421 | 5.420085  | 4.450391  |
| C | 10.300224 | 5.128518  | 4.850985  |
| H | 9.550747  | 5.497105  | 4.398753  |

|    |           |           |           |
|----|-----------|-----------|-----------|
| C  | 10.139794 | 4.275451  | 5.940094  |
| H  | 9.266247  | 4.048670  | 6.237429  |
| C  | 11.249324 | 3.754002  | 6.594294  |
| H  | 11.127191 | 3.166722  | 7.330942  |
| C  | 12.533581 | 4.080299  | 6.184891  |
| H  | 13.283373 | 3.728983  | 6.649878  |
| S  | 11.878180 | 6.520919  | 3.055010  |
| O  | 18.287571 | 10.304795 | -2.339703 |
| O  | 16.149308 | 11.262567 | -1.007449 |
| O  | 15.919241 | 8.667024  | -1.927549 |
| O  | 13.656445 | 9.512401  | -0.473079 |
| O  | 18.366182 | 10.287700 | 0.396373  |
| O  | 16.751792 | 11.336751 | 2.380075  |
| O  | 19.134800 | 10.324144 | 3.130064  |
| O  | 16.733673 | 8.769958  | 3.288247  |
| O  | 14.124571 | 9.528587  | 2.556608  |
| O  | 14.521939 | 7.238462  | 3.927582  |
| O  | 14.159986 | 7.201948  | 1.067088  |
| O  | 16.227186 | 8.723102  | 0.644474  |
| O  | 13.675151 | 7.036589  | -1.635040 |
| Mo | 17.213352 | 9.926383  | -1.064519 |
| Mo | 17.760409 | 9.967146  | 2.204092  |
| Mo | 15.095487 | 8.130805  | 2.583950  |
| Mo | 14.603521 | 8.111192  | -0.598230 |
| O  | 14.010504 | 4.670475  | 2.339703  |
| O  | 16.148767 | 3.712703  | 1.007449  |
| O  | 16.378834 | 6.308246  | 1.927549  |
| O  | 18.641630 | 5.462869  | 0.473079  |
| O  | 13.931893 | 4.687570  | -0.396373 |
| O  | 15.546283 | 3.638518  | -2.380075 |

|                |           |          |           |
|----------------|-----------|----------|-----------|
| O              | 13.163275 | 4.651126 | -3.130064 |
| O              | 15.564402 | 6.205312 | -3.288247 |
| O              | 18.173504 | 5.446683 | -2.556608 |
| O              | 17.776136 | 7.736808 | -3.927582 |
| O              | 18.138089 | 7.773322 | -1.067088 |
| O              | 16.070889 | 6.252168 | -0.644474 |
| O              | 18.622924 | 7.938681 | 1.635040  |
| Mo             | 15.084723 | 5.048887 | 1.064519  |
| Mo             | 14.537666 | 5.008124 | -2.204092 |
| Mo             | 17.202588 | 6.844465 | -2.583950 |
| Mo             | 17.694554 | 6.864078 | 0.598230  |
| <b>1_part2</b> |           |          |           |
| C              | 15.995025 | 7.092982 | 8.820223  |
| C              | 15.741662 | 7.011057 | 7.471270  |
| H              | 15.273539 | 6.270374 | 7.103542  |
| C              | 16.194449 | 8.054297 | 6.658888  |
| H              | 16.030335 | 8.030775 | 5.723484  |
| C              | 16.886087 | 9.127841 | 7.217114  |
| H              | 17.192884 | 9.827680 | 6.652997  |
| C              | 17.135940 | 9.192827 | 8.580381  |
| H              | 17.607364 | 9.932629 | 8.947136  |
| C              | 16.688929 | 8.162630 | 9.406159  |
| C              | 16.860269 | 7.997217 | 10.854756 |
| C              | 16.336864 | 6.795935 | 11.323431 |
| C              | 16.406872 | 6.375401 | 12.650547 |
| H              | 16.054232 | 5.540670 | 12.934486 |
| C              | 17.024674 | 7.254186 | 13.533579 |
| H              | 17.072530 | 7.030111 | 14.455514 |
| C              | 17.576385 | 8.455975 | 13.095366 |
| H              | 18.012422 | 9.021968 | 13.720663 |

|   |           |           |           |
|---|-----------|-----------|-----------|
| C | 17.500622 | 8.845390  | 11.758157 |
| H | 17.876771 | 9.668468  | 11.469649 |
| C | 13.887916 | 5.863755  | 10.254140 |
| C | 13.198309 | 4.679884  | 10.081461 |
| H | 13.650037 | 3.878521  | 9.843142  |
| C | 11.809457 | 4.702185  | 10.270656 |
| H | 11.302643 | 3.907341  | 10.148679 |
| C | 11.174242 | 5.868982  | 10.632163 |
| H | 10.233328 | 5.874461  | 10.759333 |
| C | 11.899842 | 7.040179  | 10.812366 |
| H | 11.452885 | 7.838463  | 11.068486 |
| C | 13.259808 | 7.047876  | 10.621703 |
| H | 13.760767 | 7.846662  | 10.738523 |
| S | 15.663984 | 5.808705  | 10.003655 |
| C | 9.299805  | -1.784230 | 11.026701 |
| C | 9.396461  | -2.867509 | 10.169177 |
| H | 10.126924 | -3.472774 | 10.211365 |
| C | 8.366367  | -3.025978 | 9.239902  |
| H | 8.381997  | -3.763912 | 8.642571  |
| C | 7.327327  | -2.120994 | 9.179161  |
| H | 6.640158  | -2.251849 | 8.535899  |
| C | 7.253320  | -1.024064 | 10.031364 |
| H | 6.531710  | -0.409733 | 9.971027  |
| C | 8.268015  | -0.846760 | 10.980091 |
| C | 8.460013  | 0.270149  | 11.908632 |
| C | 7.655175  | 1.379881  | 12.136914 |
| H | 6.826555  | 1.477221  | 11.681928 |
| C | 8.081189  | 2.346322  | 13.041415 |
| H | 7.522075  | 3.092630  | 13.220095 |
| C | 9.305276  | 2.244361  | 13.690110 |



|    |           |           |           |
|----|-----------|-----------|-----------|
| H  | 9.577236  | 2.931551  | 14.287220 |
| C  | 10.139831 | 1.147623  | 13.476692 |
| H  | 10.984950 | 1.072791  | 13.903601 |
| C  | 9.671712  | 0.172489  | 12.609258 |
| C  | 10.363796 | -2.357038 | 13.582575 |
| C  | 9.105248  | -2.632133 | 14.075289 |
| H  | 8.330769  | -2.265555 | 13.665483 |
| C  | 9.000919  | -3.460500 | 15.187703 |
| H  | 8.143328  | -3.673434 | 15.537246 |
| C  | 10.137734 | -3.975791 | 15.790705 |
| H  | 10.053259 | -4.533364 | 16.555558 |
| C  | 11.394060 | -3.686860 | 15.286980 |
| H  | 12.167309 | -4.042554 | 15.707907 |
| C  | 11.526063 | -2.870044 | 14.161354 |
| H  | 12.381416 | -2.670396 | 13.799938 |
| S  | 10.577966 | -1.287446 | 12.157833 |
| O  | 17.619643 | 2.443309  | 7.051958  |
| O  | 15.413510 | 3.459015  | 8.214470  |
| O  | 17.455009 | 2.365547  | 9.793173  |
| O  | 15.671104 | 3.527209  | 11.551345 |
| O  | 17.900979 | 2.422528  | 12.595312 |
| O  | 15.434060 | 0.978044  | 12.506862 |
| O  | 12.927603 | 1.819769  | 11.536298 |
| O  | 13.143198 | -0.473684 | 12.935899 |
| O  | 15.211248 | 0.923500  | 9.837031  |
| O  | 13.037001 | -0.502420 | 10.043475 |
| O  | 15.164894 | 0.891840  | 7.237116  |
| O  | 12.821234 | 1.835214  | 8.491747  |
| O  | 12.841207 | -0.636290 | 7.294003  |
| Mo | 16.426108 | 2.086095  | 8.223278  |

|                              |           |           |           |
|------------------------------|-----------|-----------|-----------|
| Mo                           | 16.626166 | 2.107226  | 11.519966 |
| Mo                           | 13.853596 | 0.394645  | 11.644567 |
| Mo                           | 13.703399 | 0.389452  | 8.428805  |
| O                            | 12.662358 | -3.040065 | 11.298658 |
| O                            | 14.868491 | -4.055771 | 10.136146 |
| O                            | 12.826992 | -2.962303 | 8.557443  |
| O                            | 14.610897 | -4.123965 | 6.799270  |
| O                            | 12.381022 | -3.019284 | 5.755304  |
| O                            | 14.847940 | -1.574800 | 5.843754  |
| O                            | 17.354398 | -2.416525 | 6.814318  |
| O                            | 17.138803 | -0.123072 | 5.414716  |
| O                            | 15.070753 | -1.520256 | 8.513585  |
| O                            | 17.245000 | -0.094336 | 8.307140  |
| O                            | 15.117107 | -1.488596 | 11.113500 |
| O                            | 17.460767 | -2.431971 | 9.858868  |
| O                            | 17.440794 | 0.039533  | 11.056613 |
| Mo                           | 13.855893 | -2.682851 | 10.127338 |
| Mo                           | 13.655835 | -2.703982 | 6.830650  |
| Mo                           | 16.428405 | -0.991401 | 6.706049  |
| Mo                           | 16.578602 | -0.986208 | 9.921811  |
| <b>[9]·2CH<sub>3</sub>OH</b> |           |           |           |
| Te                           | 0.931835  | 3.994886  | 8.736180  |
| C                            | 0.258788  | 2.291416  | 9.781395  |
| C                            | 1.148863  | 1.923373  | 10.806615 |
| C                            | 2.612317  | 3.718931  | 10.001345 |
| C                            | 0.779374  | 0.868521  | 11.648240 |
| H                            | 1.341686  | 0.620592  | 12.371711 |
| C                            | 2.419165  | 2.668699  | 10.899321 |
| C                            | 1.760379  | 2.916627  | 7.087467  |
| C                            | -0.931044 | 1.624626  | 9.557810  |

|    |           |           |           |
|----|-----------|-----------|-----------|
| H  | -1.520490 | 1.898734  | 8.865242  |
| C  | -1.240967 | 0.543595  | 10.370351 |
| H  | -2.032088 | 0.044658  | 10.206752 |
| C  | 3.448848  | 2.369952  | 11.797297 |
| H  | 3.349554  | 1.656965  | 12.417155 |
| C  | -0.402797 | 0.186332  | 11.422837 |
| H  | -0.646068 | -0.532816 | 11.993616 |
| C  | 4.611328  | 3.118358  | 11.777302 |
| H  | 5.309238  | 2.912008  | 12.388071 |
| C  | 3.772004  | 4.482736  | 9.975896  |
| H  | 3.874592  | 5.198804  | 9.359674  |
| C  | 4.778634  | 4.165511  | 10.884779 |
| H  | 5.586148  | 4.667528  | 10.890232 |
| C  | 2.026410  | 3.638855  | 5.945910  |
| H  | 1.828308  | 4.567432  | 5.911373  |
| C  | 2.874077  | 1.655425  | 4.891607  |
| H  | 3.268124  | 1.224244  | 4.142687  |
| C  | 2.014683  | 1.563029  | 7.131093  |
| H  | 1.801126  | 1.062552  | 7.910915  |
| C  | 2.586338  | 3.001324  | 4.849798  |
| H  | 2.773763  | 3.498721  | 4.060888  |
| C  | 2.582701  | 0.939357  | 6.036799  |
| H  | 2.773644  | 0.009240  | 6.071336  |
| Mo | -2.850650 | 5.965535  | 8.929409  |
| Mo | -0.746353 | 6.876865  | 11.193435 |
| Mo | -1.099076 | 7.354706  | 6.604850  |
| Mo | 1.081376  | 8.274044  | 8.859607  |
| O  | -2.617995 | 6.240412  | 10.841880 |
| O  | -2.912802 | 6.680370  | 7.110553  |
| O  | 0.637849  | 8.064459  | 10.728088 |

|          |           |           |           |
|----------|-----------|-----------|-----------|
| O        | 0.354571  | 8.477007  | 7.096738  |
| O        | -1.178976 | 7.289721  | 8.941042  |
| O        | -1.381299 | 7.855799  | 4.999945  |
| O        | -2.026121 | 4.495826  | 8.689282  |
| O        | -4.540129 | 5.514335  | 8.994303  |
| O        | -0.769637 | 7.043024  | 12.888502 |
| O        | 1.866150  | 6.764758  | 8.641111  |
| O        | -0.330403 | 5.833871  | 6.449431  |
| O        | -0.007566 | 5.347715  | 10.929314 |
| O        | 2.335655  | 9.422678  | 8.922138  |
| Mo       | -2.160747 | 9.433765  | 9.248245  |
| Mo       | -4.265044 | 8.522435  | 6.984218  |
| Mo       | -3.912322 | 8.044594  | 11.572803 |
| Mo       | -6.092774 | 7.125256  | 9.318047  |
| O        | -2.393402 | 9.158888  | 7.335774  |
| O        | -2.098596 | 8.718930  | 11.067101 |
| O        | -5.649247 | 7.334841  | 7.449566  |
| O        | -5.365968 | 6.922293  | 11.080916 |
| O        | -3.832422 | 8.109579  | 9.236611  |
| O        | -3.630099 | 7.543501  | 13.177708 |
| O        | -2.985277 | 10.903474 | 9.488372  |
| O        | -0.471268 | 9.884965  | 9.183351  |
| O        | -4.241761 | 8.356276  | 5.289152  |
| O        | -6.877547 | 8.634542  | 9.536542  |
| O        | -4.680994 | 9.565429  | 11.728222 |
| O        | -5.003832 | 10.051585 | 7.248339  |
| O        | -7.347053 | 5.976622  | 9.255516  |
| <b>8</b> |           |           |           |
| Te       | 9.205726  | 5.183270  | 4.720929  |
| C        | 9.058875  | 3.164461  | 5.263473  |

|   |           |           |           |
|---|-----------|-----------|-----------|
| C | 8.759391  | 4.215947  | 7.457355  |
| C | 11.336055 | 5.244614  | 4.788088  |
| C | 8.933636  | 5.427340  | 6.801561  |
| C | 8.836112  | 2.993764  | 6.636954  |
| C | 11.997903 | 5.930113  | 3.787278  |
| H | 11.511701 | 6.333199  | 3.077492  |
| C | 12.025512 | 4.631758  | 5.827087  |
| H | 11.557757 | 4.158784  | 6.505268  |
| C | 13.389373 | 6.021879  | 3.832051  |
| H | 13.856277 | 6.496112  | 3.153870  |
| C | 9.134315  | 2.092662  | 4.381180  |
| H | 9.275969  | 2.241138  | 3.454113  |
| C | 8.689958  | 1.681066  | 7.101804  |
| H | 8.538107  | 1.525192  | 8.026237  |
| C | 14.088716 | 5.418151  | 4.865783  |
| H | 15.035444 | 5.479538  | 4.892120  |
| C | 9.001620  | 0.809006  | 4.876318  |
| H | 9.072161  | 0.062654  | 4.290317  |
| C | 8.491339  | 4.237744  | 8.833470  |
| H | 8.365997  | 3.425562  | 9.308855  |
| C | 8.859424  | 6.643917  | 7.452088  |
| H | 8.982494  | 7.456806  | 6.975386  |
| C | 13.418941 | 4.727536  | 5.857375  |
| H | 13.906946 | 4.315398  | 6.560576  |
| C | 8.763569  | 0.610999  | 6.232679  |
| H | 8.650488  | -0.272026 | 6.565844  |
| C | 8.413568  | 5.454243  | 9.495848  |
| H | 8.228374  | 5.466624  | 10.428182 |
| C | 8.600273  | 6.651468  | 8.824252  |
| H | 8.552169  | 7.475797  | 9.295686  |

|    |           |           |           |
|----|-----------|-----------|-----------|
| Te | 2.588313  | 10.096175 | 2.025456  |
| C  | 1.371184  | 11.579182 | 1.140397  |
| C  | 3.682441  | 11.785144 | 2.637662  |
| C  | 1.881748  | 12.868977 | 1.355045  |
| C  | 1.511308  | 9.875060  | 3.850487  |
| C  | 0.182490  | 9.404401  | 6.210293  |
| H  | -0.271190 | 9.229233  | 7.025426  |
| C  | 3.099629  | 12.985542 | 2.187298  |
| C  | 0.247812  | 11.324430 | 0.366086  |
| H  | -0.062248 | 10.438047 | 0.227816  |
| C  | 1.207479  | 13.928333 | 0.757192  |
| H  | 1.524427  | 14.815659 | 0.879660  |
| C  | -0.408221 | 12.407636 | -0.198845 |
| H  | -1.192491 | 12.267181 | -0.715053 |
| C  | 1.457314  | 9.915858  | 6.237947  |
| H  | 1.866865  | 10.112301 | 7.071516  |
| C  | 3.697172  | 14.175646 | 2.563918  |
| H  | 3.326139  | 15.002802 | 2.280794  |
| C  | 2.153520  | 10.147253 | 5.060677  |
| H  | 3.043251  | 10.481246 | 5.076480  |
| C  | -0.445910 | 9.142361  | 5.009320  |
| H  | -1.331072 | 8.800341  | 5.001419  |
| C  | 4.839242  | 14.159130 | 3.357983  |
| H  | 5.235996  | 14.982727 | 3.620037  |
| C  | 5.405503  | 12.976749 | 3.770159  |
| H  | 6.190737  | 12.991447 | 4.304802  |
| C  | 0.223113  | 9.382331  | 3.804397  |
| H  | -0.201197 | 9.210362  | 2.972144  |
| C  | 4.837666  | 11.754067 | 3.411974  |
| H  | 5.226222  | 10.931317 | 3.684563  |

|    |           |           |           |
|----|-----------|-----------|-----------|
| C  | 0.078074  | 13.704195 | -0.013169 |
| H  | -0.369354 | 14.437294 | -0.418760 |
| Mo | 8.786130  | 5.331057  | 0.461690  |
| Mo | 5.928320  | 4.507992  | 1.716917  |
| Mo | 8.505385  | 8.321871  | 1.654366  |
| Mo | 5.661432  | 7.496800  | 2.981230  |
| O  | 7.309596  | 4.065251  | 0.335667  |
| O  | 6.872194  | 8.878828  | 2.429599  |
| O  | 9.472882  | 7.160453  | 0.306037  |
| O  | 7.183311  | 6.447999  | 1.359785  |
| O  | 4.822253  | 5.854541  | 2.466208  |
| O  | 9.575183  | 4.773093  | 1.861771  |
| O  | 4.363518  | 8.426835  | 3.597255  |
| O  | 9.263079  | 9.812271  | 1.368345  |
| O  | 9.325904  | 7.676421  | 3.007567  |
| O  | 4.824681  | 3.229515  | 1.513067  |
| O  | 9.730152  | 4.652122  | -0.837652 |
| O  | 6.877286  | 4.063283  | 3.063270  |
| O  | 6.505830  | 6.939084  | 4.353921  |
| Mo | 5.927682  | 7.260517  | -0.461690 |
| Mo | 8.785493  | 8.083581  | -1.716917 |
| Mo | 6.208428  | 4.269703  | -1.654366 |
| Mo | 9.052380  | 5.094774  | -2.981230 |
| O  | 7.404216  | 8.526323  | -0.335667 |
| O  | 7.841618  | 3.712746  | -2.429599 |
| O  | 5.240930  | 5.431120  | -0.306037 |
| O  | 7.530502  | 6.143575  | -1.359785 |
| O  | 9.891559  | 6.737033  | -2.466208 |
| O  | 5.138629  | 7.818481  | -1.861771 |
| O  | 10.350294 | 4.164738  | -3.597255 |

|   |          |          |           |
|---|----------|----------|-----------|
| O | 5.450733 | 2.779302 | -1.368345 |
| O | 5.387909 | 4.915152 | -3.007567 |
| O | 9.889132 | 9.362058 | -1.513067 |
| O | 4.983661 | 7.939451 | 0.837652  |
| O | 7.836527 | 8.528290 | -3.063270 |
| O | 8.207982 | 5.652489 | -4.353921 |



## References:

- (1) Klemperer, W. G. Introduction to Early Transition Metal Polyoxoanions. In *Inorganic Syntheses*; Ginsberg, A. P., Ed.; Wiley, 1990; pp 71–85. <https://doi.org/10.1002/9780470132586.ch14>.
- (2) Putnin, I. O.; Sysoeva, A. A.; Il'in, M. V.; Bolotin, D. S. Iodonium and Telluronium Triflates Serving as Noncovalent Organocatalysts Provide Catalytic Effect in the Schiff Condensation Due to Different Reasons. *ChemCatChem* **2024**. <https://doi.org/10.1002/cctc.202400672>.
- (3) Il'in, M. V.; Safinskaya, Y. V.; Polonnikov, D. A.; Novikov, A. S.; Bolotin, D. S. Chalcogen- and Halogen-Bond-Donating Cyanoborohydrides Provide Imine Hydrogenation. *J. Org. Chem.* **2024**, *89* (5), 2916–2925. <https://doi.org/10.1021/acs.joc.3c02282>.
- (4) Sheldrick, G. M. SHELXT – Integrated Space-Group and Crystal-Structure Determination. *Acta Crystallogr. Sect. A Found. Adv.* **2015**, *71* (1), 3–8. <https://doi.org/10.1107/S2053273314026370>.
- (5) Sheldrick, G. M. Crystal Structure Refinement with SHELXL. *Acta Crystallogr. Sect. C Struct. Chem.* **2015**, *71* (1), 3–8. <https://doi.org/10.1107/S2053229614024218>.
- (6) Hübschle, C. B.; Sheldrick, G. M.; Dittrich, B. ShelXle : A Qt Graphical User Interface for SHELXL. *J. Appl. Crystallogr.* **2011**, *44* (6), 1281–1284. <https://doi.org/10.1107/S0021889811043202>.
- (7) Palatinus, L.; Chapuis, G. SUPERFLIP – a Computer Program for the Solution of Crystal Structures by Charge Flipping in Arbitrary Dimensions. *J. Appl. Crystallogr.* **2007**, *40* (4), 786–790. <https://doi.org/10.1107/S0021889807029238>.
- (8) Palatinus, L.; van der Lee, A. Symmetry Determination Following Structure Solution in P 1. *J. Appl. Crystallogr.* **2008**, *41* (6), 975–984. <https://doi.org/10.1107/S0021889808028185>.
- (9) Palatinus, L.; Prathapa, S. J.; van Smaalen, S. EDMA : A Computer Program for Topological Analysis of Discrete Electron Densities. *J. Appl. Crystallogr.* **2012**, *45* (3), 575–580. <https://doi.org/10.1107/S0021889812016068>.
- (10) Dolomanov, O. V.; Bourhis, L. J.; Gildea, R. J.; Howard, J. A. K.; Puschmann, H. OLEX2 : A Complete Structure Solution, Refinement and Analysis Program. *J. Appl. Crystallogr.* **2009**, *42* (2), 339–341. <https://doi.org/10.1107/S0021889808042726>.
- (11) Chai, J.-D.; Head-Gordon, M. Long-Range Corrected Hybrid Density Functionals with Damped Atom–Atom Dispersion Corrections. *Phys. Chem. Chem. Phys.* **2008**, *10* (44), 6615. <https://doi.org/10.1039/b810189b>.
- (12) Frisch, M. J.; Trucks, G. W.; Schlegel, H. B.; Scuseria, G. E.; Robb, M. A.; Cheeseman, J. R.; Scalmani, G.; Barone, V.; Petersson, G. A.; Nakatsuji, H.; et al. *Gaussian 16, Revision C.01*; Gaussian 16,

Revision C.01; Gaussian, Inc.: Wallingford CT, 2016.

- (13) Barros, C. L.; de Oliveira, P. J. P.; Jorge, F. E.; Canal Neto, A.; Campos, M. Gaussian Basis Set of Double Zeta Quality for Atoms Rb through Xe: Application in Non-Relativistic and Relativistic Calculations of Atomic and Molecular Properties. *Mol. Phys.* **2010**, *108* (15), 1965–1972. <https://doi.org/10.1080/00268976.2010.499377>.
- (14) Jorge, F. E.; Canal Neto, A.; Camiletti, G. G.; Machado, S. F. Contracted Gaussian Basis Sets for Douglas–Kroll–Hess Calculations: Estimating Scalar Relativistic Effects of Some Atomic and Molecular Properties. *J. Chem. Phys.* **2009**, *130* (6), 064108. <https://doi.org/10.1063/1.3072360>.
- (15) Canal Neto, A.; Jorge, F. E. All-Electron Double Zeta Basis Sets for the Most Fifth-Row Atoms: Application in DFT Spectroscopic Constant Calculations. *Chem. Phys. Lett.* **2013**, *582*, 158–162. <https://doi.org/10.1016/j.cplett.2013.07.045>.
- (16) de Berrêdo, R. C.; Jorge, F. E. All-Electron Double Zeta Basis Sets for Platinum: Estimating Scalar Relativistic Effects on Platinum(II) Anticancer Drugs. *J. Mol. Struct. THEOCHEM* **2010**, *961* (1–3), 107–112. <https://doi.org/10.1016/j.theochem.2010.09.007>.
- (17) Bader, R. F. W. A Quantum Theory of Molecular Structure and Its Applications. *Chem. Rev.* **1991**, *91* (5), 893–928. <https://doi.org/10.1021/cr00005a013>.
- (18) Lu, T.; Chen, F. Multiwfn: A Multifunctional Wavefunction Analyzer. *J. Comput. Chem.* **2012**, *33* (5), 580–592. <https://doi.org/10.1002/jcc.22885>.
- (19) Jovanovic, D.; Poliyodath Mohanan, M.; Huber, S. M. Halogen, Chalcogen, Pnictogen, and Tetrel Bonding in Non-Covalent Organocatalysis: An Update. *Angew. Chemie Int. Ed.* **2024**, *63* (31). <https://doi.org/10.1002/anie.202404823>.
- (20) Vogel, L.; Wonner, P.; Huber, S. M. Chalcogen Bonding: An Overview. *Angew. Chemie Int. Ed.* **2019**, *58* (7), 1880–1891. <https://doi.org/10.1002/anie.201809432>.
- (21) Bleiholder, C.; Gleiter, R.; Werz, D. B.; Köppel, H. Theoretical Investigations on Heteronuclear Chalcogen–Chalcogen Interactions: On the Nature of Weak Bonds between Chalcogen Centers. *Inorg. Chem.* **2007**, *46* (6), 2249–2260. <https://doi.org/10.1021/ic062110y>.
- (22) Bondi, A. Van Der Waals Volumes and Radii of Metals in Covalent Compounds. *J. Phys. Chem.* **1966**, *70* (9), 3006–3007. <https://doi.org/10.1021/j100881a503>.
- (23) Espinosa, E.; Molins, E.; Lecomte, C. Hydrogen Bond Strengths Revealed by Topological Analyses of Experimentally Observed Electron Densities. *Chem. Phys. Lett.* **1998**, *285* (3–4), 170–173. [https://doi.org/10.1016/S0009-2614\(98\)00036-0](https://doi.org/10.1016/S0009-2614(98)00036-0).
